1 **Title: c-Jun N-terminal kinase (JNK) signaling contributes to cystic burden in polycystic**  
2 **kidney disease**

3 Short Title: JNK drives cystic kidney disease

4  
5 Abigail O. Smith<sup>1</sup> ID, Julie A. Jonassen<sup>2</sup> ID, Kenley M. Preval<sup>1</sup> ID, Roger J. Davis<sup>1</sup> ID, and Gregory J.  
6 Pazour<sup>1\*</sup> ID

7  
8 <sup>1</sup>Program in Molecular Medicine, University of Massachusetts Medical School, Biotech II, Suite  
9 213, 373 Plantation Street, Worcester, MA, USA 01605

10 <sup>2</sup>Department of Microbiology and Physiological Systems, University of Massachusetts Medical  
11 School, 55 Lake Avenue North, Worcester MA 01655

12 \*Correspondence to: Telephone: 508 856 8078, Email: [gregory.pazour@umassmed.edu](mailto:gregory.pazour@umassmed.edu)

13 ID

14 AOS: <https://orcid.org/0000-0003-2765-8737>

15 JAJ: <https://orcid.org/0000-0001-9997-2069>

16 KMP: <https://orcid.org/0000-0002-2425-0878>

17 RJD: <https://orcid.org/0000-0002-0130-1652>

18 GJP: <https://orcid.org/0000-0002-6285-8796>

19

20 Key words:

21 Abbreviations: PKD, polycystic kidney disease; ADPKD, autosomal dominant polycystic kidney  
22 disease; JNK, jun N-terminal kinase; cAMP, cyclic adenosine monophosphate; AP-1, activator  
23 protein-1; H&E, Hematoxylin and eosin; LTA, Lotus tetragonolobus agglutinin; DBA, Dolichos  
24 biflorus agglutinin; MAP, mitogen-activated protein; MAP2K, mitogen-activated protein kinase  
25 kinase; MAP3K, mitogen-activated protein kinase kinase kinase; SMA, alpha smooth muscle  
26 actin; DAPI, 4',6-diamidino-2-phenylindole; GPCR, G-protein coupled receptor

27

## 28 **Abstract**

29 Polycystic kidney disease is an inherited degenerative disease in which the uriniferous tubules  
30 are replaced by expanding fluid-filled cysts that ultimately destroy organ function. Autosomal  
31 dominant polycystic kidney disease (ADPKD) is the most common form, afflicting approximately  
32 1 in 1,000 people. It primarily is caused by mutations in the transmembrane proteins  
33 polycystin-1 (*Pkd1*) and polycystin-2 (*Pkd2*). The most proximal effects of *Pkd* mutations leading  
34 to cyst formation are not known, but pro-proliferative signaling must be involved for the tubule  
35 epithelial cells to increase in number over time. The c-Jun N-terminal kinase (JNK) pathway  
36 promotes proliferation and is activated in acute and chronic kidney diseases. Using a mouse  
37 model of cystic kidney disease caused by *Pkd2* loss, we observe JNK activation in cystic kidneys  
38 and observe increased nuclear phospho c-Jun in cystic epithelium. Genetic removal of *Jnk1* and  
39 *Jnk2* suppresses the nuclear accumulation of phospho c-Jun, reduces proliferation and reduces  
40 the severity of cystic disease. While *Jnk1* and *Jnk2* are thought to have largely overlapping  
41 functions, we find that *Jnk1* loss is nearly as effective as the double loss of *Jnk1* and *Jnk2*. Jnk  
42 pathway inhibitors are in development for neurodegeneration, cancer, and fibrotic diseases.  
43 Our work suggests that the JNK pathway should be explored as a therapeutic target for ADPKD.

## 44 **Author Summary**

45 Autosomal dominant polycystic kidney disease is a leading cause of end stage renal disease  
46 requiring dialysis or kidney transplant. During disease development, the cells lining the kidney  
47 tubules proliferate. This proliferation transforms normally small diameter tubules into fluid-  
48 filled cysts that enlarge with time, eventually destroying all kidney function. Despite decades of  
49 research, polycystic kidney disease remains incurable. Furthermore, the precise signaling events  
50 involved in cyst initiation and growth remain unclear. The c-Jun N-terminal kinase (JNK), is a  
51 major pathway regulating cellular proliferation and differentiation but its importance to  
52 polycystic kidney disease was not known. We show that JNK activity is elevated in cystic kidneys  
53 and that reducing JNK activity decreases cyst growth pointing to JNK inhibition as a therapeutic  
54 strategy for treating polycystic kidney disease.

55

## 56 **Introduction**

57 Autosomal dominant polycystic kidney disease (ADPKD) is the most common form of inherited  
58 kidney disease, afflicting approximately 1 in 1,000 people in the United States and worldwide.  
59 Patients with ADPKD exhibit gradual kidney function decline due to uncontrolled epithelial cell  
60 proliferation and secretion that transforms narrow uriniferous tubules into large, fluid-filled  
61 cysts. The majority of ADPKD cases are due to mutations in either of two transmembrane  
62 proteins, polycystin-1 (Pkd1) and polycystin-2 (Pkd2), that form a heterotetrameric complex in  
63 the primary ciliary membranes [1]. It is widely believed that perturbing this ciliary complex,  
64 either by loss-of-function mutations or disrupting cilia structure triggers the cellular phenotype  
65 that leads to cyst formation [2-4]. Although the precise mechanism by which the polycystin  
66 complex preserves tubule architecture remains obscure, some aspects of pro-cystic signaling  
67 have been established. For example, Pkd1 or Pkd2 loss leads to reduced intracellular calcium  
68 and, subsequently, an abnormal cellular response to cyclic adenosine monophosphate (cAMP)  
69 levels [5-7]. In mutant epithelial cells, elevated cAMP promotes increased fluid secretion and  
70 epithelial cell proliferation [8]. cAMP reduction via vasopressin 2 receptor antagonism is the  
71 mechanism of action of tolvaptan, the single FDA-approved drug for patients with ADPKD [9,  
72 10]. Unfortunately, tolvaptan slows but does not halt disease progression and is not  
73 appropriate for all ADPKD patients due to side effects [11]. To improve treatments for ADPKD,  
74 we must search for alternative pro-cystic signaling pathways.

75         Prior studies showed that the c-Jun N-terminal kinase (JNK) signaling pathway is  
76 activated in cells overexpressing exogenous Pkd1 [12, 13] or Pkd2 [14] constructs. A later study  
77 found the opposite, that Pkd1 loss activated JNK signaling, while Pkd1 overexpression repressed  
78 JNK activity [15]. Reports of JNK activity in cystic tissues are also conflicting [16, 17], and no  
79 follow-up studies established JNK's role in cyst formation. JNK is a member of the MAP kinase  
80 family, which also includes Erk1/2, p38, and Erk5. JNK pathway activators include extracellular  
81 stimuli such as UV irradiation, osmotic stress, and cytokines that initiate an intracellular  
82 phosphorylation cascade through upstream MAP kinase kinase kinases (MAP3K). Jnk-associated  
83 MAP3Ks converge on two MAP kinase kinases (MAP2Ks), Mkk4 and Mkk7. The MAP2Ks  
84 phosphorylate MAP kinases including the Jnk paralogs: Jnk1 (Mapk8), Jnk2 (Mapk9), and Jnk3

85 (Mapk10). Jnk1 and Jnk2 are ubiquitously expressed, while Jnk3 expression is restricted  
86 primarily to the central nervous system and testis [18]. Although Jnks have a wide array of  
87 substrates, the most studied are the activator protein-1 (AP-1) transcription factors, particularly  
88 c-Jun, for which the pathway is named. Increased AP-1 levels have been detected in cystic  
89 kidneys in humans and mice [16]. Furthermore, AP-1 promotes proliferation and cell survival by  
90 regulating oncogene transcription [19] including *c-Myc*, which was recently shown to contribute  
91 directly to cystic kidney disease [20, 21].

92 JNK activation has been detected in many forms of kidney disease [22]. In animal  
93 models, JNK inhibition prior to ischemia-reperfusion or tubule obstruction reduces  
94 inflammation and fibrosis, and preserves kidney function [23-27]. Interestingly, acute kidney  
95 injury exacerbates polycystic kidney disease [28-30]. In chronic kidney insult, progressive  
96 interstitial fibrosis contributes to organ failure. JNK inhibition reduces pro-fibrotic factors in the  
97 kidney [26, 27]. Furthermore, researchers produced severe kidney fibrosis in mice by  
98 overexpressing the JNK target *c-Jun* [31].

99 This study aimed to investigate the role of JNK signaling in ADPKD using *in vivo* models  
100 to genetically perturb the pathway. Here we show that *Pkd2* deletion increases JNK activation,  
101 which contributes to cystic kidneys in young animals and cystic liver in older animals. Jnk1 is  
102 more important to the phenotype development than is Jnk2. Overall, our results encourage  
103 further investigation of the JNK pathway as a novel therapeutic candidate for treating ADPKD.

## 104 **Methods**

### 105 **Mouse Studies**

106 The following mouse strains have been described previously: *Pkd2<sup>fl</sup>* [32], *Jnk1<sup>fl</sup>* [33], *Jnk2<sup>null</sup>* [34],  
107 *Rosa26-Cre<sup>ERT2</sup>* [35], *Ask1<sup>-/-</sup>* [36], *Mlk2<sup>-/-</sup>* [37] and *Mlk3<sup>-/-</sup>* [38]. The *Ask1* (B6.129S4-  
108 Map3k5<sup>tm1Hijo</sup>) mouse was provided by the RIKEN BRC through the National Bio-Resource  
109 Project of MEXT, Japan. *Stra8-iCre* [39] was used to convert *Jnk1<sup>fl</sup>* to *Jnk1<sup>null</sup>*. All mice were  
110 maintained on a C57BL/6J genetic background. These studies were approved by the  
111 Institutional Animal Care and Use Committee of the University of Massachusetts Medical  
112 School.

113 For juvenile onset disease model, mothers were dosed with tamoxifen (200 mg/kg) by  
114 oral gavage on postnatal days 2, 3, and 4. The pups remained with nursing mothers until  
115 euthanasia at postnatal day 21. For the adult-onset disease model, animals were treated with  
116 tamoxifen (50 mg/kg) by intraperitoneal injection on postnatal days 21, 22, and 23. Mice were  
117 euthanized 24 weeks after first injection. Both sexes were used in all studies.

## 118 **Histology**

119 Tissues were fixed by immersion overnight in 10% formalin (Electron Microscopy Sciences) in  
120 phosphate-buffered saline and then embedded in paraffin. Sections were deparaffinized and  
121 stained with hematoxylin and eosin (H&E) or one-step trichrome. Images of stained sections  
122 were obtained with a Zeiss Axio Scan.Z1 slide scanner with brightfield capabilities using the 20X  
123 objective. Cystic index was calculated using ImageJ software to outline kidney sections, apply a  
124 mask to differentiate cystic from non-cystic regions, and measure the two-dimensional areas.  
125 Cystic index = cystic area/total kidney area x 100%.

126 For immunofluorescent staining, sections were deparaffinized, antigens were retrieved  
127 by autoclaving for 30 min in 10 mM sodium citrate, pH 6.0 and stained with primary antibodies  
128 diluted in TBST (10 mM Tris, pH 7.5, 167 mM NaCl, and 0.05% Tween 20) plus 0.1% cold water  
129 fish skin gelatin (Sigma-Aldrich). Alexa Fluor–labeled secondary antibodies (Invitrogen) were  
130 used to detect the primary antibodies. Primary antibodies used included aquaporin 2 (1:100;  
131 Sigma # 5200110), phospho S63 c-Jun (1:1000, Cell Signaling Technology), phospho S10 histone  
132 H3 (1:250; Millipore # 06570), SMA (1:50,000, Sigma # A5228). FITC-conjugated lectins were  
133 added with secondary antibodies: Lotus tetragonolobus agglutinin (LTA, 1:50, Vector Labs) and  
134 Dolichos biflorus agglutinin (DBA, 1:20, Vector Labs). Nuclei were labeled with 4',6-diamidino-2-  
135 phenylindole (DAPI). Fluorescent images were obtained with a Zeiss LSM900+ Airyscan  
136 microscope. Fluorescent slide scans for Figure 1A and Figure 5A were obtained using Zeiss Axio  
137 Scan.Z1 slide scanner.

## 138 **Gene expression**

139 Kidneys were stored at -80C in RNAlater (Qiagen) until RNA was isolated. For total RNA  
140 isolation, tissues were homogenized using TissueLyser II (Qiagen) and RNA isolated using the

141 RNeasy Mini Kit (Qiagen). cDNA was synthesized using SuperScript II Reverse Transcription  
142 (Invitrogen). Real time quantitative PCR was performed with KAPA SYBR FAST Universal reagent  
143 (Roche) using an Eppendorf Realplex2 cyler. All qPCR reactions were performed in triplicate  
144 and melting curves verified that a single product was amplified. Standard curves were  
145 generated by 5-fold serial dilutions of a pool of untreated mouse kidney cDNA, and for each  
146 gene, the threshold cycle was related to log cDNA dilution by linear regression analysis. Gene  
147 expression data were normalized to glyceraldehyde-3-phosphate dehydrogenase expression.  
148 The following primers were used: *Pkd2 forward* CGAGGAGGAGGATGACGAAGAC; *Pkd2 reverse*  
149 TGGAAACGATGCTGCCAATGGA; *Gapdh forward* GCAATGCATCCTGCACCACCA; *Gapdh reverse*  
150 TTCCAGAGGGGCCATCCACA.

### 151 **Immunoblotting**

152 For Figure 1 only, kidneys stored in RNAlater were homogenized in Buffer RLT (RNeasy MiniKit,  
153 Qiagen). Protein was precipitated from the supernatant by adding 9 volumes of 100%  
154 methanol, collected by centrifugation at 3,000xg for 10 min at 4C followed by three washes in  
155 90% methanol. Protein pellets were reconstituted in 2X SDS-PAGE loading buffer. In all other  
156 experiments, frozen kidneys were homogenized in ice-cold RIPA buffer (150 mM NaCl, 1%  
157 Triton X-100, 0.05% sodium deoxycholate, 0.01% SDS, 50 mM Tris-HCl, pH 7.5) supplemented  
158 with Complete Mini EDTA-free Protease Inhibitor cocktail tablets (Roche), sodium  
159 orthovanadate (0.5 mM), sodium fluoride (10 mM), and phenylmethylsulfonyl fluoride (1 mM).  
160 Equal amounts of protein were loaded and separated in 12% SDS-PAGE gels and transferred to  
161 Immobilon-FL PVDF membranes (Millipore). Membranes were blocked for 1 hour at room  
162 temperature with Intercept (TBS) Blocking Buffer (Li-Cor) or 5% non-fat dry milk in TBST  
163 followed by incubation with primary antibodies overnight at 4C.

164 The following antibodies were used: JNK1/2 (1:1000, BD Pharmingen # 554285), c-Jun  
165 (1:200, Santa Cruz Biotechnology # 74543), phospho T183/Y185 SAPK/JNK (1:1000, Cell  
166 Signaling Technology # 9251), phospho S63 c-Jun (1:1000, Cell Signaling Technology # 9261),  
167 glyceraldehyde-3-phosphate dehydrogenase (1:10,000, Proteintech, 60004-1-Ig), SMA (1:1,000,  
168 Sigma # A5228), glyceraldehyde-3-phosphate dehydrogenase (1:1,000, Cell Signaling  
169 Technology # 3683S), phospho T180/Y182 p38, (Cell Signaling Technology # 9211). Primary

170 antibodies were detected using near infrared secondary antibodies (Li-Cor) and blots were  
171 imaged on Odyssey Li-Cor imager. Quantification was performed using Image Studio Lite  
172 software.

## 173 **Results**

### 174 **Postnatal deletion of *Pkd2* activates JNK signaling in juvenile mouse kidneys.**

175 To assess JNK signaling in an *in vivo* ADPKD model, we induced *Pkd2* deletion in postnatal mice  
176 by the tamoxifen inducible RosaCre<sup>ERT2</sup> driver. This widely expressed Cre causes gene deletion  
177 in most cells, including kidney tubule epithelium [40, 41]. We administered tamoxifen via  
178 maternal oral gavage on postnatal (P) days 2-4 and harvested on P21. Treating *Pkd2 flox (fl)*  
179 homozygotes (*Rosa26-Cre<sup>ERT2</sup>; Pkd2<sup>fl/fl</sup>*) resulted in extensive kidney cysts. In contrast,  
180 heterozygous mice (*Rosa26-Cre<sup>ERT2</sup>; Pkd2<sup>fl/+</sup>*) similarly treated, exhibited no cysts and thus  
181 served as controls (Figure 1A).

182 Total Jnk protein in *Pkd2* mutant kidneys was unchanged compared to controls but  
183 phosphorylated Jnk was significantly increased (Figure 1B-D). These antibodies recognize both  
184 Jnk1 and Jnk2, each of which is alternatively spliced to generate 54 kDa and 46 kDa products  
185 (Supplemental Figure 3A). *Pkd2* loss did not significantly alter total c-Jun levels, but did elevate  
186 phosphorylated c-Jun (Figure 1B, E-F). Our findings indicate that *Pkd2* deletion activates JNK  
187 signaling and could drive cyst formation.

### 188 **JNK inhibition reduces severity of cystic phenotype in juvenile *Pkd2* mutant mice.**

189 Our finding that the loss of *Pkd2* activates JNK signaling could indicate that JNK activation drives  
190 cyst formation, or cyst formation could activate JNK signaling. To distinguish these possibilities,  
191 we tested how JNK inhibition affects cyst formation driven by *Pkd2* loss. Mice express three Jnk  
192 paralogs. *Jnk1* and *Jnk2* are widely expressed including in kidney, while *Jnk3* is limited to brain  
193 and testis [18]. Thus, we focused on *Jnk1* and *Jnk2*. Losing both genes causes embryonic  
194 lethality. To circumvent lethality, we intercrossed parents carrying germline *Jnk2* deletions and  
195 floxed *Jnk1* alleles with *Pkd2<sup>fl</sup>; Rosa26-Cre<sup>ERT2</sup>* alleles used previously. Offspring, carrying  
196 assorted alleles, were treated with tamoxifen on P2-4, harvested on P21, and genotyped (Figure  
197 2). *Pkd2* heterozygotes carrying any number of wild-type *Jnk* alleles had normal kidney to body



198 weight and no evidence of structural abnormalities or cysts. Kidneys lacking *Pkd2* but carrying  
199 at least one wild-type allele of *Jnk1* and *Jnk2* showed severe cystic disease similar to *Pkd2*  
200 deletion alone. Kidneys lacking *Pkd2* and all functional *Jnk* alleles had a 23% reduction in two-  
201 kidney to body weight and a 16% reduction in cystic index (Figure 2B-C). Hematoxylin and eosin  
202 (H&E) stained mid-sagittal sections revealed large cysts at the cortical-medullary boundary and  
203 smaller cysts in the cortex and medulla in *Pkd2* mutants with intact JNK activity. *Jnk* deletion  
204 reduced cysts in the cortex and medulla. Cysts remained at the cortical-medullary boundary but  
205 were less extensive (Figure 2A). Our observation that *Jnk* deletion reduces disease severity  
206 supports the hypothesis that JNK activation contributes to cystic disease.

207 We observed variability in kidney to body weight in *Pkd2* mutants (Figure 2B). We  
208 hypothesized that this was due to variation in *Pkd2* levels after Cre-mediated deletion. To test  
209 our hypothesis, we measured *Pkd2* mRNA levels by RT-qPCR and normalized to *Gapdh*. Non-  
210 cystic controls (*Rosa26-Cre<sup>ERT2</sup>; Pkd2<sup>fl/+</sup>*) used throughout this study, are expected to have about  
211 one half as much *Pkd2* message as Cre-negative animals and this was observed (Supplemental  
212 Figure 1). Cystic groups (*Rosa26-Cre<sup>ERT2</sup>; Pkd2<sup>fl/fl</sup>*) with or without JNK activity showed reduced  
213 *Pkd2* mRNA levels compared to non-cystic controls but the reduction did not reach significance  
214 due to variation between animals. Importantly, we found similar variation and no difference in  
215 mean *Pkd2* mRNA levels in *Pkd2* mutants with and without *Jnk* alleles. This finding indicates  
216 that the difference in cystic burden between *Pkd2* mutants with and without JNK activity is not  
217 due to systematic differences in *Pkd2* levels.

218 Multiple upstream MAP3Ks activate JNK. Identifying and inhibiting relevant MAP3Ks in  
219 the context of cystic kidney disease could be therapeutically beneficial. To this end, we selected  
220 three MAP3K genes, *Ask1* (*Map3k5*), *Mlk2* (*Map3k10*), and *Mlk3* (*Map3k11*), with connections  
221 to kidney disease for further analysis. *Ask1* inhibition reduces kidney and liver fibrosis [42].  
222 *Cdc42* and *Rac1* mediate JNK activation in the context of polycystin overexpression in cells [12,  
223 14] and activate *Mlk2* and *Mlk3* [37, 43, 44]. However, in our model, *Ask1* deletion  
224 (Supplemental Figure 2A) or double deletion of *Mlk2* and *Mlk3* (Supplemental Figure 2B) did  
225 not reduce cystic burden in *Pkd2* mutants. Thus, identifying relevant MAP3Ks will require  
226 further investigation.



227 ***Pkd2* deletion activates the transcription factor c-Jun in kidney tubule epithelial cells.**

228 The c-Jun subunit of the AP-1 transcription factor complex is dually phosphorylated by Jnk on  
229 serines 63 and 73 [45]. To detect nuclear-localized phosphorylated c-Jun, indicating JNK  
230 activation, we probed kidney sections for phospho S63 c-Jun. In control kidneys, we found no  
231 positive nuclei in proximal tubule cells (defined by LTA staining) or collecting duct cells (defined  
232 by DBA staining) (Figure 3). Cystic kidneys due to *Pkd2* loss exhibited extensive phospho S63 c-  
233 Jun nuclear staining in both proximal tubules and collecting ducts. Consistent with most cysts in  
234 this model deriving from collecting ducts, we observed more phospho S63 c-Jun positive cells in  
235 DBA-positive tubules compared to LTA-positive tubules. *Jnk* deletion reduced phospho S63 c-  
236 Jun positive cells nearly to wild type levels (Figure 3). Our findings confirm that JNK activation  
237 occurs in the tubule epithelium and correlates positively with regions of increased cyst  
238 formation.

239 **JNK inhibition reduces tubule epithelial cell proliferation in juvenile *Pkd2* mutant mice.**

240 Cyst growth depends on tubule epithelial cell proliferation, and a recent study found  
241 differential expression of cell cycle genes in *Pkd2* mutant mouse kidneys [46]. To determine  
242 whether *Jnk* deletion reduces tubule cell proliferation in *Pkd2* mutant kidneys, we probed tissue  
243 sections for the mitotic marker phospho S10 histone H3 (Figure 4). As expected, *Pkd2* mutant  
244 kidneys showed markedly increased proliferation compared to wild type. Proximal tubule cell  
245 proliferation nearly doubled from 2.3% in wild-type kidneys to 4.3% in *Pkd2* kidneys. *Jnk*  
246 deletion returned the rate to wild-type levels (Figure 4B). In collecting ducts, proliferation was  
247 nearly ten times higher in *Pkd2* mutants compared to wild type and *Jnk* deletion reduced  
248 proliferation by 43% (Figure 4C). These findings suggest that JNK inhibition reduces cyst  
249 formation by inhibiting tubule epithelial cell proliferation.

250 **JNK inhibition reduces fibrosis in juvenile *Pkd2* mutant mice.**

251 JNK signaling promotes interstitial fibrosis in non-cystic kidney disease models [25, 26]. As  
252 fibrosis also contributes to advanced cystic kidney disease [47], we hypothesized that *Jnk*  
253 deletion may reduce fibrosis in *Pkd2* mutants. To measure fibrosis, we stained kidney sections  
254 for alpha-smooth muscle actin (SMA), a marker of active myofibroblasts (Figure 5). As expected,  
255 SMA staining was restricted to perivascular regions in wild-type kidneys. In contrast, *Pkd2*

256 mutants exhibited significant SMA expression surrounding cystic and non-cystic tubules while  
257 *Pkd2* mutants lacking JNK activity had decreased SMA staining (Figure 5A-B) and reduced SMA  
258 protein levels (Figure 5C-D). Thus, JNK inhibition reduces interstitial fibrosis in *Pkd2* mutant  
259 kidneys.

260 ***Jnk1* is primarily responsible for reducing cystic disease in juvenile *Pkd2* mutant kidneys.**

261 *Jnk1* and *Jnk2* are largely redundant in development but their roles diverge in adult tissues in a  
262 complex manner that is incompletely understood, yet critical for developing JNK inhibitor  
263 therapies [48, 49]. To determine how each *Jnk* gene contributes to cysts, we crossed parents  
264 carrying *Pkd2*<sup>fl</sup>; *Rosa26-Cre*<sup>ERT2</sup> alleles and germline *Jnk2*<sup>null</sup> or *Jnk1*<sup>null</sup> alleles. We treated mice as  
265 in Figure 2. Trichrome staining revealed that *Pkd2* heterozygotes were non-cystic with normal  
266 collagen deposition (Figure 6A). In contrast, *Pkd2* mutants contained large cysts at the cortical-  
267 medullary boundary and smaller cysts throughout. Collagen deposits were notable at the outer  
268 medulla and cyst boundaries. As shown in Figure 2, complete JNK deletion reduced cortical-  
269 medullary cysts. Collagen staining was visible but reduced. *Pkd2* mutants lacking only *Jnk1*  
270 exhibited fewer cysts and less fibrosis than *Pkd2* mutants with intact JNK. In contrast, *Pkd2*  
271 mutants lacking only *Jnk2* resembled cystic *Pkd2* mutants with JNK signaling intact. Kidney to  
272 body weight ratios and cystic indices support the histological evidence that *Jnk1* deletion  
273 reduces cysts more than *Jnk2* deletion (Figure 6B-C).

274 Immunoblots revealed increased c-Jun phosphorylation in *Pkd2* mutants (Figure 6D-E).  
275 Combined *Jnk1* and *Jnk2* deletion reduced phospho S63 c-Jun to near wild-type levels. *Jnk1*  
276 deletion also reduced phospho S63 c-Jun to near wild-type levels while *Jnk2* deletion did not.  
277 Our findings complement a recent study in which *Jnk1* deletion, but not *Jnk2* deletion, limited  
278 ischemia-reperfusion injury in mouse kidneys [23].

279 To measure Jnk isoform expression and phosphorylation, we probed immunoblots with  
280 antibodies against total and phosphorylated Jnk (Supplemental Figure 3A). Two independent  
281 splicing events generate four isoforms each from *Jnk1* and *Jnk2*. One site regulates inclusion of  
282 mutually exclusive exon 6a/6b, however these forms are not distinguishable by immunoblot.  
283 The other dictates choice of a C-terminal coding exon yielding long (p54) and short (p46)

284 isoforms of both *Jnk1* and *Jnk2*, which can be distinguished by immunoblot (Supplemental  
285 Figure 3A). Dual phosphorylation at Thr-Pro-Tyr activates all Jnk isoforms [50, 51], and we  
286 detected increased phosphorylation of p54 and p46 in *Pkd2* mutant kidneys (Supplemental  
287 Figure 3A, 3C). *Jnk2* deletion alone reduced p54 and phospho-p54 as effectively as total *Jnk*  
288 deletion. However, *Jnk1* deletion had no effect, suggesting p54 derives mostly from Jnk2. *Jnk1*  
289 and *Jnk2* single deletions reduced phospho-p46, suggesting p46 derives from both genes. We  
290 detected a third band (p45), whose phosphorylation was elevated in all *Pkd2* mutants including  
291 those lacking *Jnk1* or *Jnk2*. The observation that p45 remains in both *Jnk1* and *Jnk2* mutants  
292 suggests that it can be generated from either gene perhaps through a yet undescribed splicing  
293 event or a post translational modification. Alternatively, p45 could arise from antibody cross-  
294 reactivity with a different protein. Possibly, MAP kinase p38, as p38's phosphorylation pattern  
295 matches p45 (Supplemental Figure 3D) however, p38 migrates faster than p45 making this  
296 unlikely. Our results show that *Pkd2* loss induces phosphorylation of long and short isoforms of  
297 *Jnk1* and *Jnk2*, but *Jnk1* is the critical enzyme for cystic disease.

#### 298 **JNK deletion reduces severity of cystic liver disease in adult *Pkd2* mutant mice.**

299 Inhibiting JNK signaling reduced cystic kidney disease in a rapidly progressing model of ADPKD.  
300 However, humans with ADPKD accumulate cysts over decades. Thus, we wanted to evaluate  
301 JNK signaling in a slowly progressing disease model. In mice, timing of cystic gene deletion  
302 determines rate of disease progression. *Pkd1* loss prior to P13 causes cyst accumulation within  
303 weeks, while deletion after P14 delays cysts for 5-6 months [52, 53]. For our slow-progressing  
304 model, we delivered tamoxifen at P21-23. *Pkd2* mutants aged 6 months showed no signs of  
305 kidney cysts in histological sections or by 2-kidney to body weight ratios (Supplemental Figure  
306 4). Segregation by sex revealed no differences between *Pkd2* mutants with or without *Jnk*  
307 (Supplemental Figure 5). We expect that *Pkd2* mutants would develop kidney cysts at older  
308 ages based on evidence from *Pkd1* models [52], but severe liver findings (Figure 7) precluded  
309 further aging.

310 Polycystic liver disease is the most common extrarenal ADPKD symptom [54].

311 Interestingly, despite lacking kidney cysts, adult *Pkd2* mutants contained numerous biliary liver  
312 cysts. Livers were enlarged and indurated, with visible fluid-filled cysts causing a yellowish hue

313 (Figure 7B). Trichrome staining showed extensive cystic and fibrotic changes throughout, with  
314 rare areas of healthy tissue. We observed numerous small and occasional large cysts, frequently  
315 surrounded by collagen (Figure 7A). JNK inhibition significantly improved liver cysts, reducing  
316 liver to body weight ratio by 38% (Figure 7C). Polycystic liver disease is more prevalent in  
317 females than males [55], but all mice in our study developed liver cysts after *Pkd2* deletion with  
318 no difference between males and females (Supplemental Figure 5). JNK-deleted cystic livers  
319 were smaller and remained indurated and pale (Figure 7B) with reduced cysts and fibrosis  
320 (Figure 7A). In addition to driving cyst progression in juvenile *Pkd2* mutant kidneys, JNK  
321 signaling also contributes to cyst progression in adult *Pkd2* mutant livers.

## 322 **Discussion**

323 Improving ADPKD treatment requires understanding signaling downstream of the polycystins.  
324 We investigated JNK's role in promoting cysts due to *Pkd2* loss and found that disrupting JNK  
325 signaling reduced kidney cysts in juvenile mice and liver cysts in adult mice. Our findings invite  
326 further exploration of JNK as a therapeutic target for ADPKD. JNK inhibitors have successfully  
327 treated liver and kidney disease in animals [24-26, 56-58]. Unfortunately, toxic effects ended  
328 multiple human clinical trials [59] suggesting that JNK inhibition would not be appropriate in  
329 chronic conditions like ADPKD. However, it is expected that the loss of *Pkd2* would activate a  
330 MAP3K upstream of JNK. MAP3K inhibitors are in development as clinical reagents, and these  
331 do not show the toxic effects of Jnk inhibitors [60-64] making them more appropriate for  
332 ADPKD. Of course, identification of the relevant MAP3K is required. Mouse and human  
333 genomes encode 24 MAP3Ks, with at least 14 known to phosphorylate *Mkk4* or *Mkk7* upstream  
334 of Jnks [18, 65]. Our studies suggest that *Ask1*, *MLK2* and *MLK3* are not relevant, leaving the  
335 critical MAP3K still to be identified.

336 MAPK signaling is typically activated by receptor tyrosine kinases, GPCRs and other  
337 membrane receptors detecting stress, cytokines, growth factors and other agonists. Signals are  
338 often propagated to the MAP3Ks by the action of *Rac1* and *Cdc42*. Overexpression of *Pkd2* or  
339 the C-terminal tail of *Pkd1* can activate JNK and dominant negative mutations of *Rac1* and  
340 *Cdc42* block the activation [12, 14]. These observations suggest that the polycystins act

341 upstream of MAP3Ks, but the mechanism is unknown. Polycystins can function as atypical  
342 GPCRs to activate heterotrimeric G proteins [13, 15, 66] suggesting a possible mechanism.  
343 Alternatively, less direct mechanisms such as altered calcium signaling could be involved.  
344 Polycystin mutations are known to reduce cellular calcium and calcium levels can regulate JNK  
345 through PI3K/Akt [67].

346         The protective effect of JNK inhibition on cystic disease is driven by *Jnk1*. *Jnk1* and *Jnk2*  
347 are structurally similar [50] and have overlapping functions. However, evidence suggests  
348 distinct and even opposing roles for Jnks in tissue homeostasis and cancer [68, 69]. Functional  
349 differences between *Jnk1* and *Jnk2* may be due to alternative processing of their transcripts.  
350 Two independent splicing events produce four distinct isoforms of both genes. One event alters  
351 the open reading frame at the C-terminus [50] and has unknown consequences to protein  
352 function. Another event dictates inclusion of mutually exclusive exons 6a/6b (mice) or 7a/7b  
353 (humans) within the kinase domain and appears to affect kinase activity [70]. *Jnk* splicing in  
354 mouse kidney is uncharacterized, but the *Jnk1* and *Jnk2* produced in kidney may contain  
355 different versions of exon 6, which could influence isoform activity or substrate specificity.

356         94% of ADPKD patients develop hepatic cysts by their fourth decade, but most remain  
357 asymptomatic [71]. Rarely, severe liver involvement requires surgery to reduce liver volume  
358 [55, 72]. In our adult model of *Pkd2* deletion, we found extensive liver cysts after six months,  
359 without detectable kidney cysts. Similarly, liver cysts were detected earlier than kidney cysts in  
360 an adult mouse model of Cre-mediated *Pkd1* deletion [52]. In our model, *Jnk* deletion  
361 suppressed hepatic cysts. A previous study demonstrated a requirement of *Jnk* for hepatic cyst  
362 formation in models of mitochondrial redox stress-induced cholangiocarcinoma [73]. However,  
363 this role of JNK to promote cystogenesis appears to be dependent on physiological context  
364 because *Jnk* deletion alone was sufficient to cause hepatic cyst formation in another study of  
365 aged mice [74-76]. JNK signaling may have tissue-specific roles in ADPKD that will be important  
366 to evaluate for therapeutic development.

367         Our work demonstrates that *Pkd2* loss activates JNK and genetic removal of *Jnk* reduces  
368 cystic burden in mice with *Pkd2* mutations. Further studies will elucidate the pathway by which

369 polycystin loss leads to JNK dysregulation, but our work suggests that JNK pathway inhibitors  
370 could be effective treatments for ADPKD.

### 371 **Author Contributions**

372 GJP, RJD and AOS designed the experiments and co-wrote the manuscript; AOS, KMP and JAJ  
373 performed experiments; AOS produced the figures.

### 374 **Acknowledgements**

375 This work was supported by National Institute of Health grant DK103632 to G.J.P and DK107220  
376 to R.J.D. We thank Dr. Ichigo for providing *Ask1*<sup>-/-</sup> mice.

### 377 **Disclosures**

378 The authors have no conflicts to disclose.

### 379 **Supplemental Material Table of Contents**

380 Supplemental Figure 1. Variation in *Pkd2* mRNA levels is similar in *Pkd2* mutants with or without  
381 *Jnk*.

382 Supplemental Figure 2. Deletion of MAP3 Kinases *Ask1*, *Mlk2* and *Mlk3* is not sufficient to  
383 reduce kidney cysts in juvenile *Pkd2* mutant mice.

384 Supplemental Figure 3. *Pkd2* loss induces phosphorylation of long and short isoforms of *Jnk1*  
385 and *Jnk2*.

386 Supplemental Figure 4. Adult mice do not develop kidney cysts within 6 months of *Pkd2*  
387 deletion.

388 Supplemental Figure 5. Sex does not influence severity of cystic phenotype in adult *Pkd2*  
389 mutant mice.

### 390 **Figures**

391



**Figure 1. Postnatal deletion of Pkd2 activates JNK signaling in mouse kidneys.**

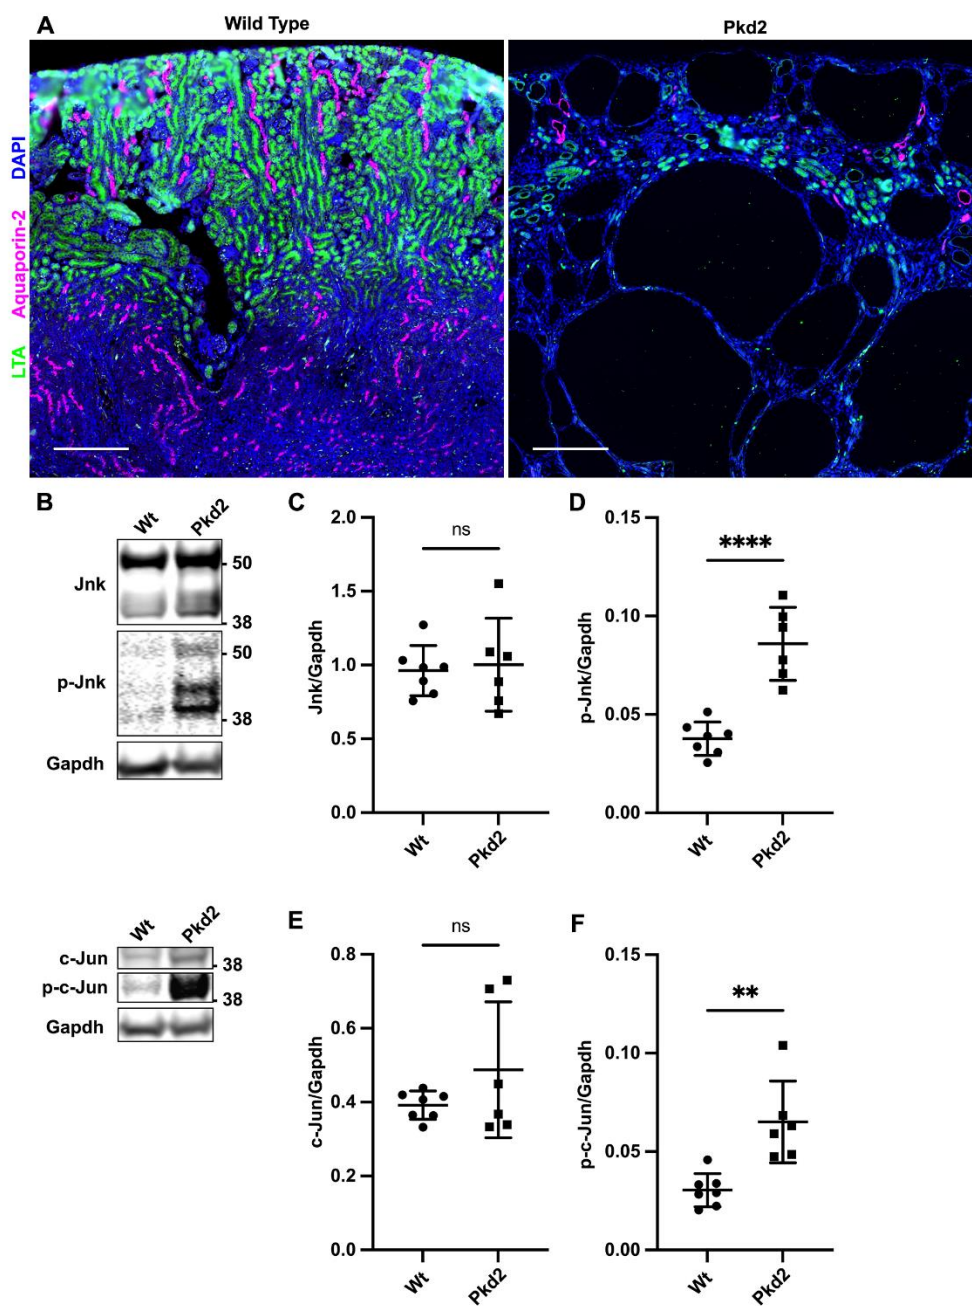

392

393



394 **Figure 1. Postnatal deletion of *Pkd2* activates JNK signaling in juvenile mouse kidneys.**

395 Mice with the following genotypes were treated with tamoxifen at P2-4 and collected at P21:

396 Wt (*Rosa26-Cre<sup>ERT2</sup>; Pkd2<sup>fl/+</sup>*), *Pkd2* (*Rosa26-Cre<sup>ERT2</sup>; Pkd2<sup>fl/fl</sup>*).

397 (A) Kidney sections were probed for tubule epithelial markers LTA (proximal tubules) and  
398 aquaporin-2 (collecting ducts). Nuclei were marked by DAPI. Images are slide scans obtained on  
399 Zeiss Axio Scan.Z1 with 20X objective. Scale bar is 500 microns.

400 (B) Whole kidney protein samples were immunoblotted for total Jnk, phospho T183/Y185 Jnk,  
401 total c-Jun, phospho S63 c-Jun, and loading control Gapdh.

402 (C-F) Quantification of immunoblots described in (B). N is 7 (Wt), 6 (*Pkd2*). \*\*\*\*,  $P < 0.0001$ ; \*\*,  
403  $P < 0.01$ ; ns, not significant by unpaired two-tailed t-test. Error bars indicate SD.

404

**Figure 2. JNK inhibition reduces kidney cysts in juvenile Pkd2 mutant mice.**

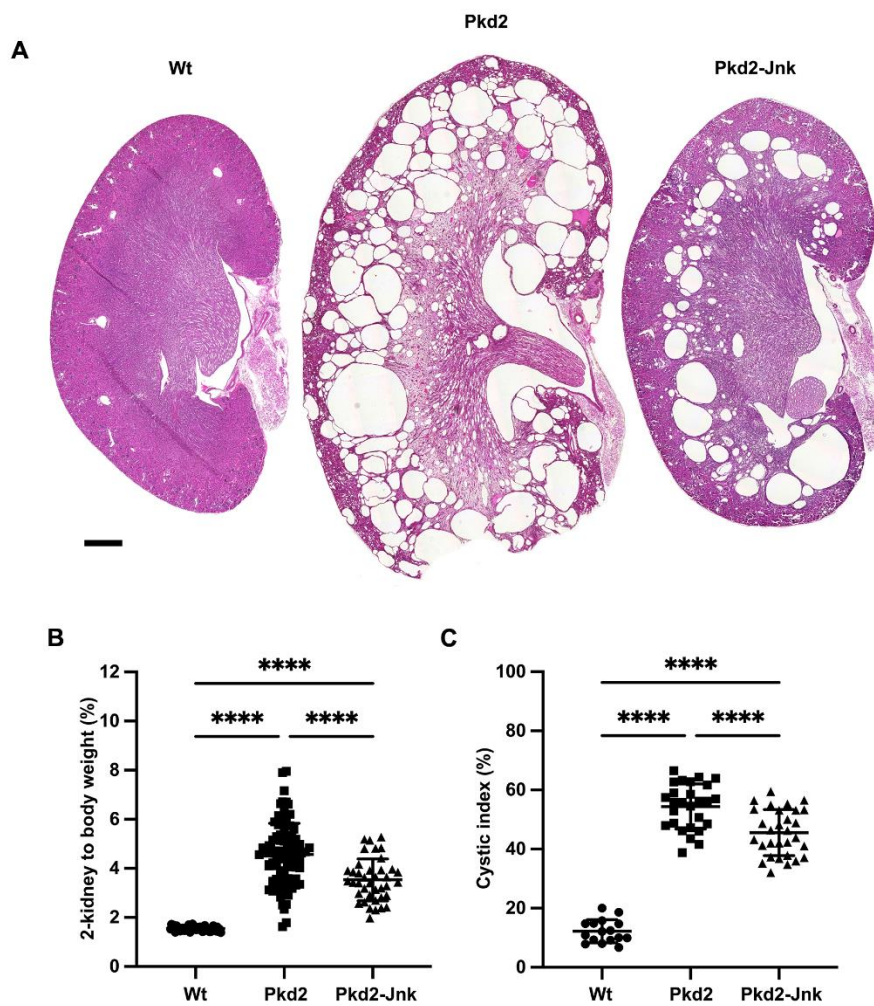

406 **Figure 2. JNK inhibition reduces kidney cysts in juvenile *Pkd2* mutant mice.**

407 Mice with the following genotypes were treated with tamoxifen at P2-4 and collected at P21:

408 Wt (*Rosa26-Cre<sup>ERT2</sup>; Pkd2<sup>fl/+</sup>*), *Pkd2* (*Rosa26-Cre<sup>ERT2</sup>; Pkd2<sup>fl/fl</sup>; Jnk1<sup>+/+</sup>, fl/+; Jnk2<sup>+/+</sup>, +/-*), and *Pkd2*-Jnk  
409 (*Rosa26-Cre<sup>ERT2</sup>; Pkd2<sup>fl/fl</sup>; Jnk1<sup>fl/fl</sup>; Jnk2<sup>null/null</sup>*).

410 (A) Kidney sections from P21 mice were stained with H&E to show the extent of disrupted  
411 organ architecture. Scale bar is 500 microns and applies to all images in the panel.

412 (B) Cystic burden was quantified using the ratio of 2-kidney weight / body weight x 100%. N is  
413 42 (Wt), 88 (*Pkd2*), 39 (*Pkd2*-Jnk). \*\*\*\*,  $P < 0.0001$  by one-way ANOVA followed by Tukey  
414 multiple comparison test with multiplicity-adjusted p-values. Error bars indicate SD.

415 (C) Cystic index (cystic area / total kidney area x 100%) was calculated for mid-sagittal H&E-  
416 stained kidney sections. N is 16 (Wt), 27 (*Pkd2*), 30 (*Pkd2*-Jnk). \*\*\*\*,  $P < 0.0001$  by one-way  
417 ANOVA followed by Tukey multiple comparison test with multiplicity-adjusted p-values. Error  
418 bars indicate SD.

419

Figure 3. Pkd2 deletion activates c-Jun in kidney tubule epithelial cells.

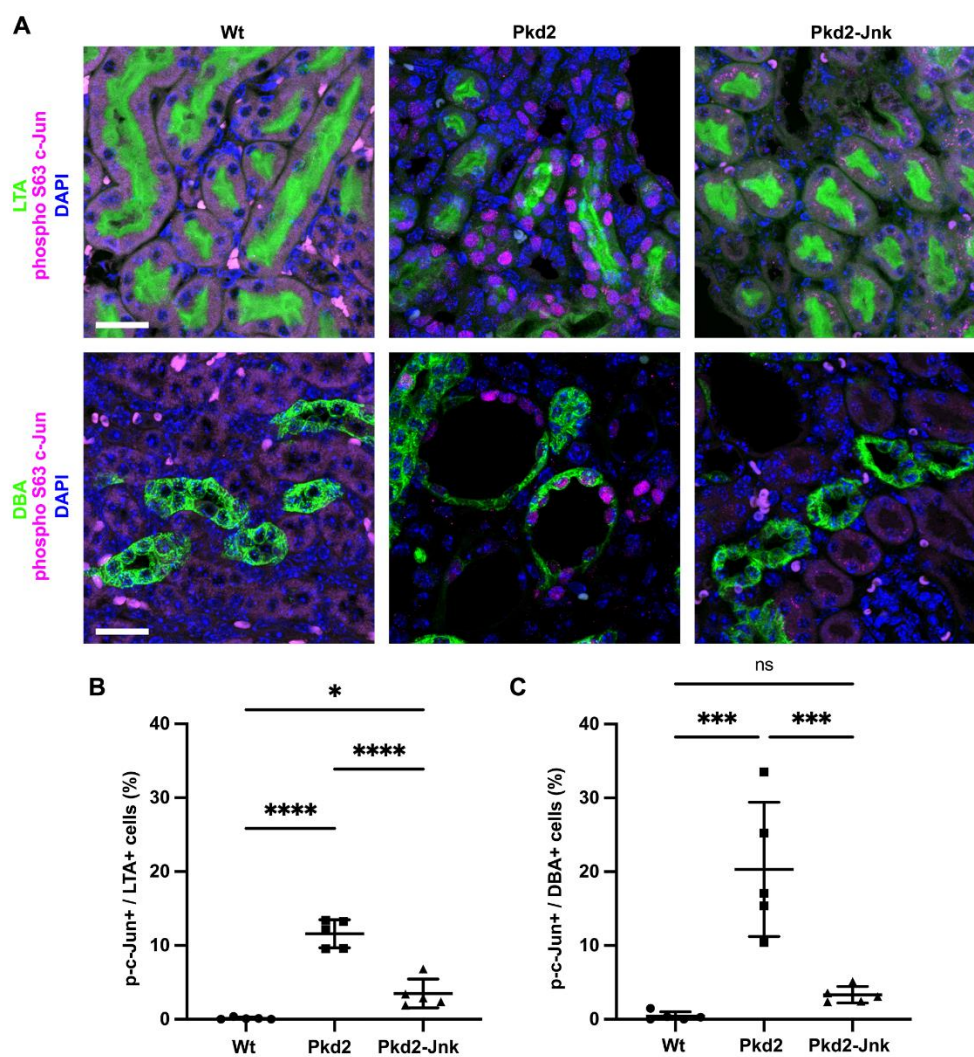

421 **Figure 3. *Pkd2* deletion activates c-Jun in kidney tubule epithelial cells.**

422 Mice with the following genotypes were treated with tamoxifen at P2-4 and collected at P21:

423 Wt (*Rosa26-Cre<sup>ERT2</sup>; Pkd2<sup>fl/+</sup>*), *Pkd2* (*Rosa26-Cre<sup>ERT2</sup>; Pkd2<sup>fl/fl</sup>; Jnk1<sup>+/+</sup>, fl/+; Jnk2<sup>+/+</sup>, +/-*), and *Pkd2-Jnk*  
424 (*Rosa26-Cre<sup>ERT2</sup>; Pkd2<sup>fl/fl</sup>; Jnk1<sup>fl/fl</sup>; Jnk2<sup>null/null</sup>*).

425 (A) Kidney sections were probed for phospho S63 c-Jun and tubule epithelial markers LTA  
426 (proximal tubules) or DBA (collecting ducts). Nuclei were marked by DAPI. Images are maximum  
427 projection of z-stacks (20 slices at 0.5um intervals) obtained on Zeiss LSM 900 Airyscan  
428 microscope with 40X objective. Scale bar is 20 microns and applies to all images in the panel.

429 (B-C) Quantification of the proportion of tubule epithelial cells with nuclei positive for phospho  
430 S63 c-Jun. (B) Proximal tubules (LTA+) and (C) collecting ducts (DBA+) were quantified  
431 separately. N is 5 animals per group, 1000-2000 cells per animal. \*\*\*\*,  $P < 0.0001$ ; \*\*\*,  $P <$   
432  $0.001$ ; \*,  $P < 0.05$ ; ns, not significant by one-way ANOVA followed by Tukey multiple  
433 comparison test with multiplicity-adjusted p-values. Error bars indicate SD.

434



**Figure 4. JNK inhibition reduces tubule cell proliferation in Pkd2 mutant mice.**

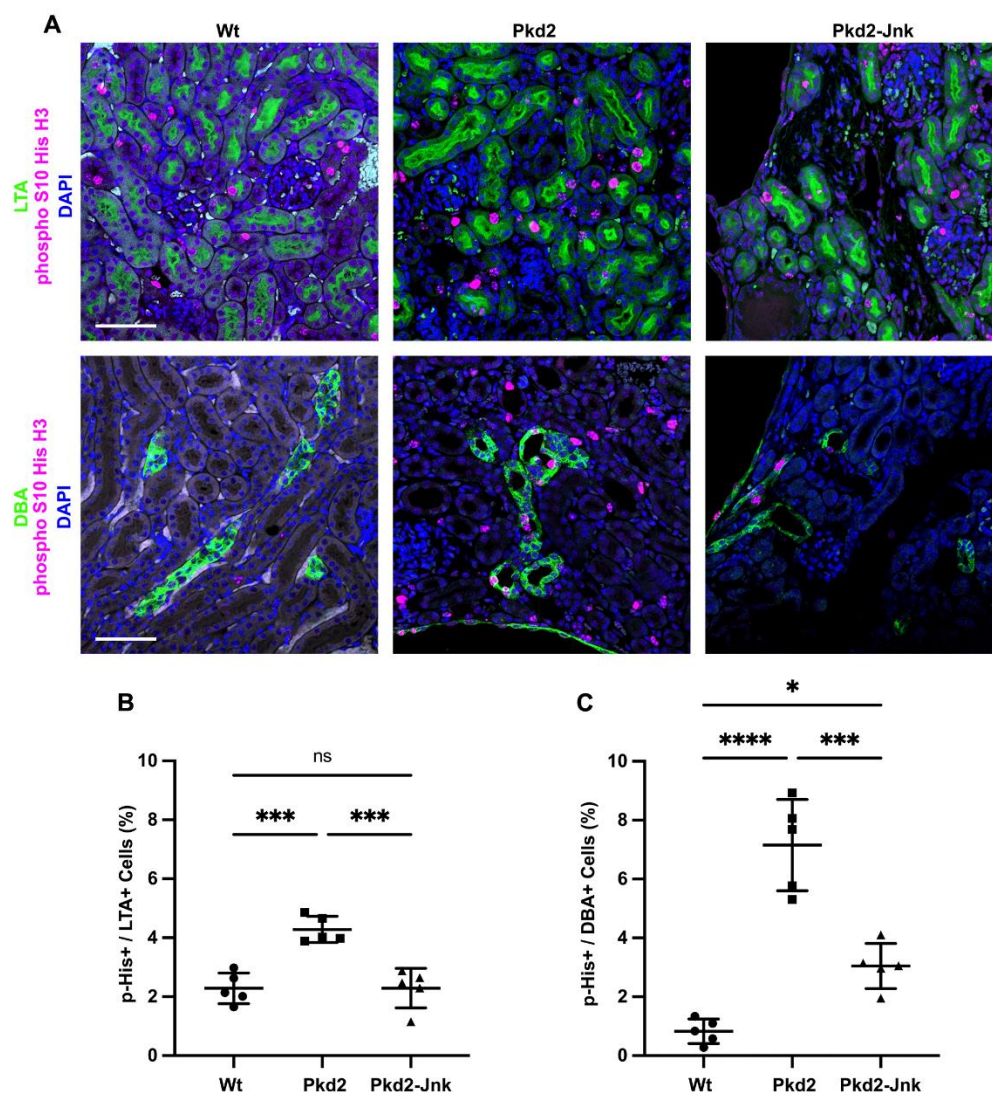

436 **Figure 4. JNK inhibition reduces tubule cell proliferation in juvenile *Pkd2* mutant mice.**

437 Mice with the following genotypes were treated with tamoxifen at P2-4 and collected at P21:

438 Wt (*Rosa26-Cre<sup>ERT2</sup>; Pkd2<sup>fl/+</sup>*), *Pkd2* (*Rosa26-Cre<sup>ERT2</sup>; Pkd2<sup>fl/fl</sup>; Jnk1<sup>+/+, fl/+</sup>; Jnk2<sup>+/+, +/-</sup>*), and *Pkd2-Jnk*

439 (*Rosa26-Cre<sup>ERT2</sup>; Pkd2<sup>fl/fl</sup>; Jnk1<sup>fl/fl</sup>; Jnk2<sup>null/null</sup>*).

440 (A) Kidney sections from P21 mice were probed for the mitotic marker phospho S10 histone H3

441 along with tubule epithelial markers LTA (proximal tubules) and DBA (collecting ducts). Nuclei

442 were marked with DAPI. Images are maximum projection of z-stacks (10 slices at 0.5um

443 intervals) obtained on Zeiss LSM 900 Airyscan microscope with 20X objective. Scale bar is 50

444 microns and applies to all images in the panel.

445 (B-C) Quantification of the proportion of tubule cells with nuclei positive for phospho S10

446 histone H3. (B) Proximal tubule cells (LTA+) and (C) collecting duct cells (DBA+) were quantified

447 separately. N is 5 animals per group, 1000-2000 cells per animal. \*\*\*\*,  $P < 0.0001$ ; \*\*\*,  $P <$

448  $0.001$ ; \*,  $P < 0.05$ ; ns, not significant by one-way ANOVA followed by Tukey multiple

449 comparison test with multiplicity-adjusted p-values. Error bars indicate SD.

450



**Figure 5. JNK inhibition reduces fibrosis in juvenile Pkd2 mutant mice.**

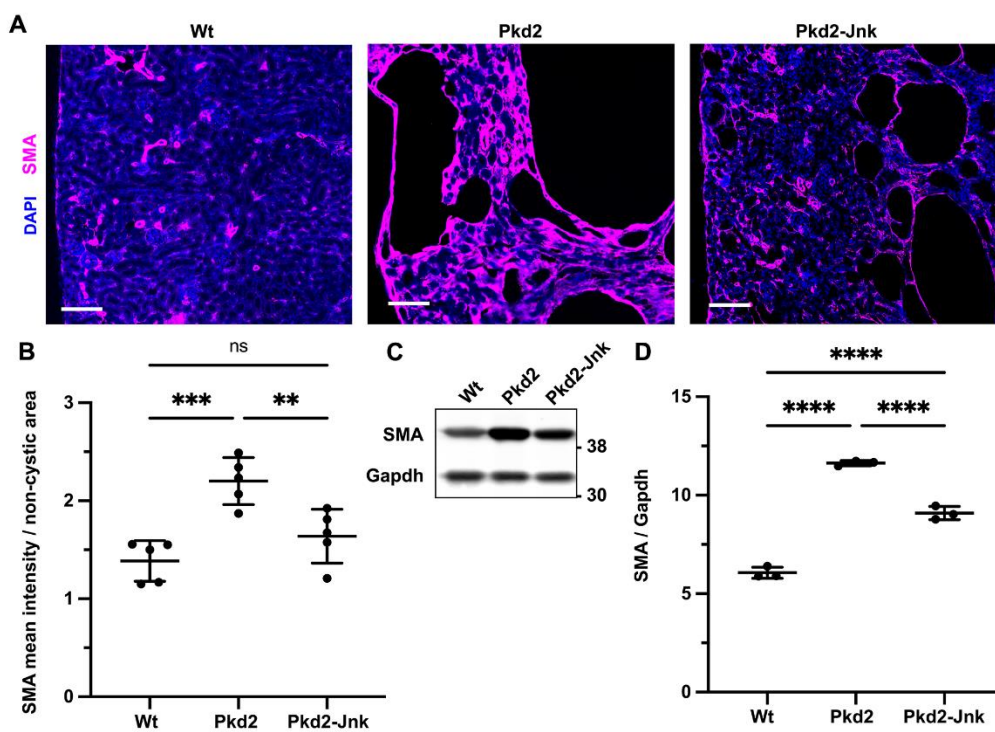

452 **Figure 5. JNK inhibition reduces fibrosis in juvenile *Pkd2* mutant mice.**

453 Mice with the following genotypes were treated with tamoxifen at P2-4 and collected at P21:

454 Wt (*Rosa26-Cre<sup>ERT2</sup>; Pkd2<sup>fl/+</sup>*), *Pkd2* (*Rosa26-Cre<sup>ERT2</sup>; Pkd2<sup>fl/fl</sup>; Jnk1<sup>+/+, fl/+</sup>; Jnk2<sup>+/+, +/-</sup>*), and *Pkd2-Jnk*  
455 (*Rosa26-Cre<sup>ERT2</sup>; Pkd2<sup>fl/fl</sup>; Jnk1<sup>fl/fl</sup>; Jnk2<sup>null/null</sup>*).

456 (A) Kidney sections from P21 mice were probed for SMA, a marker of active fibroblasts. Nuclei  
457 were stained with DAPI. Images are slide scans obtained on Zeiss Axio Scan.Z1 with 20X  
458 objective. Scale bar is 100 microns.

459 (B) Mean intensity of SMA staining and non-cystic kidney area were measured using ImageJ  
460 software. Graphed values are SMA mean intensity / non-cystic area \* 100,000. N is 5 animals  
461 per group. \*\*\*, P < 0.001; \*\*, P < 0.01; ns, not significant by one-way ANOVA followed by Tukey  
462 multiple comparison test with multiplicity-adjusted p-values. Error bars indicate SD.

463 (C) Whole kidney protein samples from P21 mice were immunoblotted for SMA and loading  
464 control Gapdh.

465 (D) Quantification of immunoblots described in (C). N is 3 animals per groups. \*\*\*\*, P < 0.0001  
466 by one-way ANOVA followed by Tukey multiple comparison test with multiplicity-adjusted p-  
467 values. Error bars indicate SD.

468

**Figure 6. Jnk1 deletion is primarily responsible for reduction in cystic phenotype in Pkd2 mutant mice.**

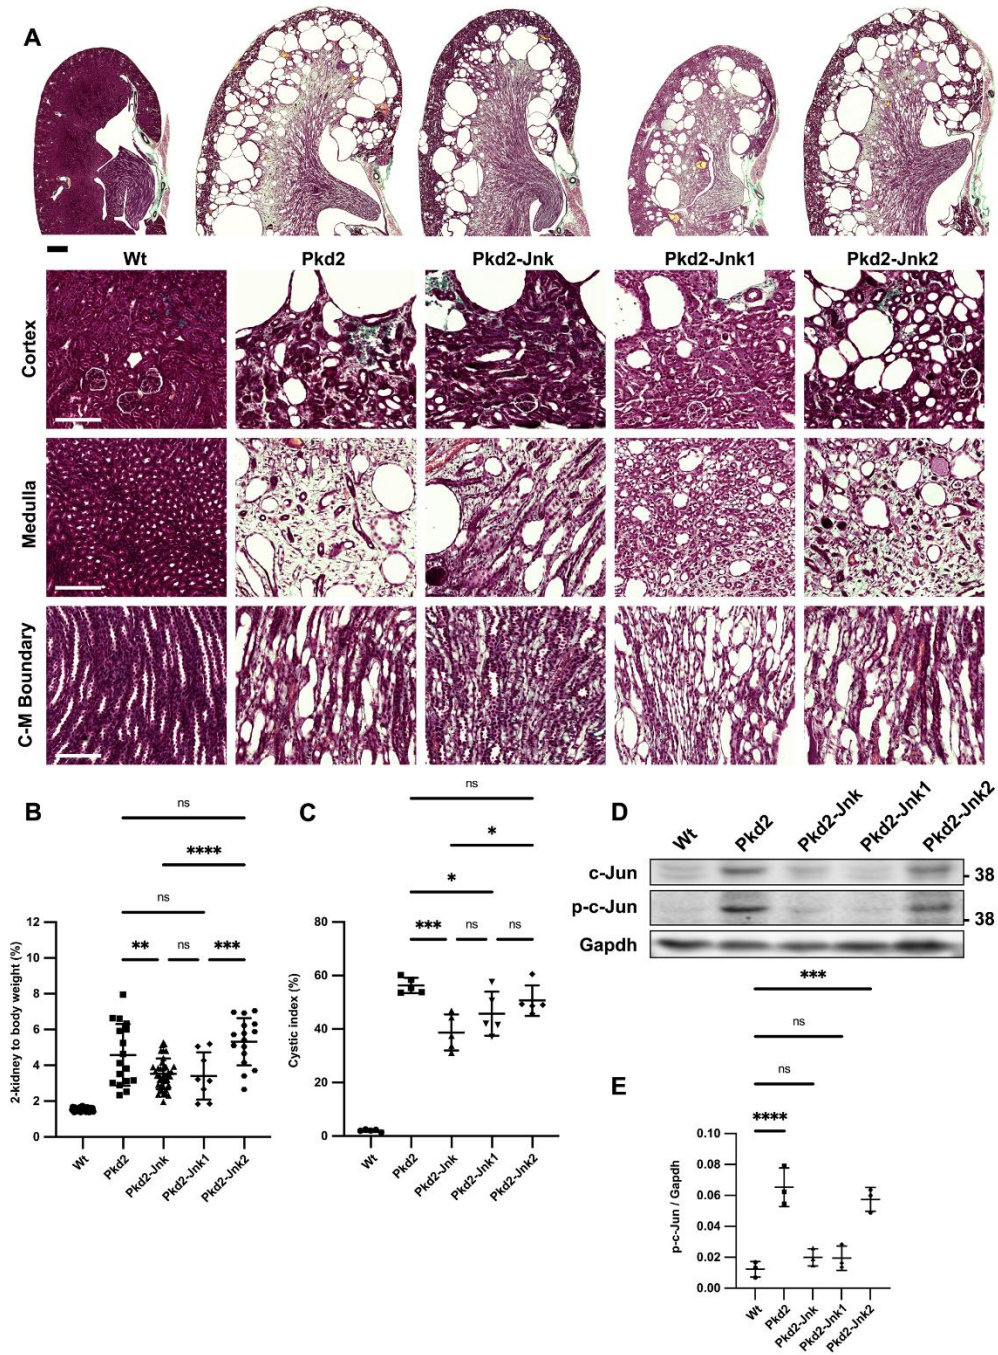

470 **Figure 6. *Jnk1* deletion rather than *Jnk2* is primarily responsible for reducing cystic disease in**  
471 **juvenile *Pkd2* mutant kidneys.**

472 Mice with the following genotypes were treated with tamoxifen at P2-4 and collected at P21:  
473 *Pkd2*-*Jnk1* (*Rosa26-Cre<sup>ERT2</sup>*; *Pkd2<sup>fl/fl</sup>*; *Jnk1<sup>null/null</sup>*; *Jnk2<sup>+/+</sup>*); *Pkd2*-*Jnk2* (*Rosa26-Cre<sup>ERT2</sup>*; *Pkd2<sup>fl/fl</sup>*;  
474 *JNK1<sup>+/+</sup>*; *Jnk2<sup>null/null</sup>*). We compared the results from these animals to the groups described  
475 previously: Wt (*Rosa26-Cre<sup>ERT2</sup>*; *Pkd2<sup>fl/+</sup>*, *JNK1<sup>+/+</sup>*; *Jnk2<sup>+/+</sup>*), *Pkd2* (*Rosa26-Cre<sup>ERT2</sup>*; *Pkd2<sup>fl/fl</sup>*; *JNK1<sup>+/+</sup>*;  
476 *Jnk2<sup>+/+</sup>*), *Pkd2*-*Jnk* (*Rosa26-Cre<sup>ERT2</sup>*; *Pkd2<sup>fl/fl</sup>*; *Jnk1<sup>fl/fl</sup>*; *Jnk2<sup>null/null</sup>*).

477 (A) Kidney sections were stained with one-step trichrome which marks collagen fibers pale  
478 green, cytoplasm red, and nuclei dark blue. Scale bar for full size kidney scans is 500 microns.  
479 Insets show detail from cortex (top), cortical-medullary boundary (middle), and medulla  
480 (bottom). Scale bar for insets is 100 microns.

481 (B) Cystic burden was quantified using the ratio of 2-kidney weight / body weight x 100%. Wt  
482 and *Pkd2*-*Jnk* data is the same as shown in Figure 2B. *Pkd2* data overlaps with Figure 2B, but  
483 only includes animals with four wild-type alleles of *Jnk*. N is 42 (Wt), 17 (*Pkd2*), 39 (*Pkd2*-*Jnk*), 8  
484 (*Pkd2*-*Jnk1*), 16 (*Pkd2*-*Jnk2*). \*\*\*\*, P < 0.0001; \*\*\*, P < 0.001; \*\*, P < 0.01; ns, not significant by  
485 one-way ANOVA followed by Tukey multiple comparison test with multiplicity-adjusted p-  
486 values. Error bars indicate SD.

487 (C) Cystic index (cystic area / total kidney area \* 100%) was calculated for mid-sagittal  
488 trichrome-stained kidney sections. N is 5 animals per group. \*\*\*, P < 0.001; \*, P < 0.05; ns, not  
489 significant by one-way ANOVA followed by Tukey multiple comparison test with multiplicity-  
490 adjusted p-values. Error bars indicate SD.

491 (D) Whole kidney protein lysates were immunoblotted for total c-Jun, phospho S63 c-Jun and  
492 loading control Gapdh.

493 (E) Quantification of immunoblots described in (D). N is 3 animals per group. \*\*\*\*, P < 0.0001;  
494 \*\*\*, P < 0.001; ns, not significant by one-way ANOVA followed by Tukey multiple comparison  
495 test with multiplicity-adjusted p-values. Error bars indicate SD.

496



**Figure 7. JNK inhibition reduces cysts in adult Pkd2 mutant livers.**

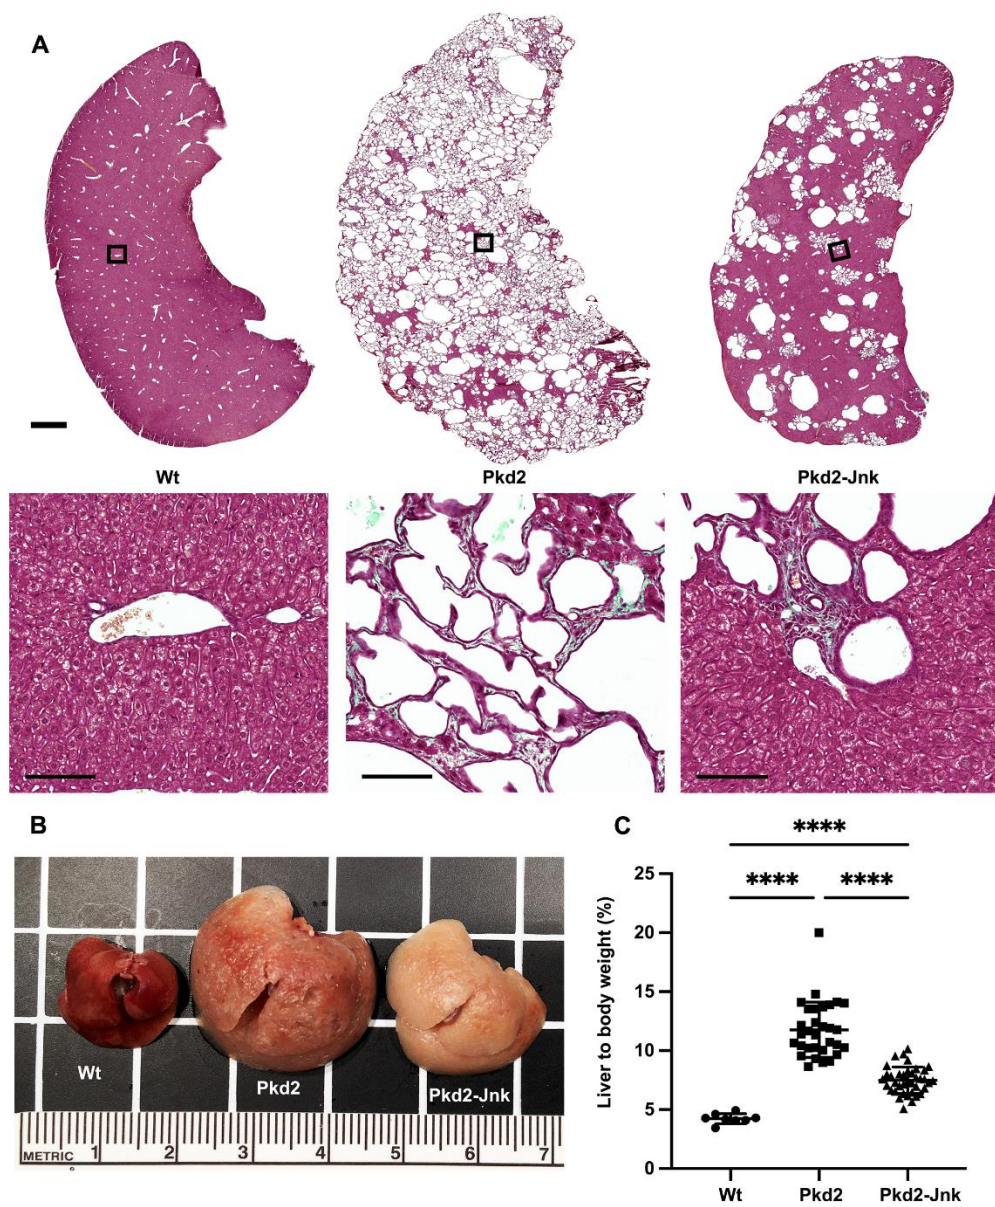

498 **Figure 7. JNK inhibition reduces cysts in in adult *Pkd2* mutant livers.**

499 Mice with the following genotypes were treated with tamoxifen at P21-23 and collected 24  
500 weeks later: Wt (*Rosa26-Cre<sup>ERT2</sup>; Pkd2<sup>fl/+</sup>*), *Pkd2* (*Rosa26-Cre<sup>ERT2</sup>; Pkd2<sup>fl/fl</sup>; Jnk1<sup>+/+</sup>, fl/+; Jnk2<sup>+/+</sup>, +/-*),  
501 *Pkd2-Jnk* (*Rosa26-Cre<sup>ERT2</sup>; Pkd2<sup>fl/fl</sup>; Jnk1<sup>fl/fl</sup>; Jnk2<sup>null/null</sup>*).

502 (A) Liver sections were stained with one-step trichrome to mark collagen fibers pale green,  
503 cytoplasm red, and nuclei dark blue. Black boxes indicate magnified regions. Scale bar is 1000  
504 microns for full size liver scans, 100 microns for insets.

505 (B) Gross morphology of cystic livers. Centimeter ruler is shown.

506 (C) Cystic burden in the liver was quantified using the ratio of liver weight / body weight x  
507 100%. N is 8 (Wt), 31 (*Pkd2*), 38 (*Pkd2-Jnk*). \*\*\*\*, P < 0.0001; \*\*\*, P < 0.001 by one-way ANOVA  
508 followed by Tukey multiple comparison test with multiplicity-adjusted p-values. Error bars  
509 indicate SD.

510 **References**

- 511 1. Su Q, Hu F, Ge X, Lei J, Yu S, Wang T, et al. Structure of the human PKD1-PKD2 complex.  
512 Science. 2018;361(6406). Epub 2018/08/11. doi: 10.1126/science.aat9819. PubMed PMID:  
513 30093605.
- 514 2. Pazour GJ. Intraflagellar transport and cilia-dependent renal disease: the ciliary  
515 hypothesis of polycystic kidney disease. J Am Soc Nephrol. 2004;15(10):2528-36. Epub  
516 2004/10/07. doi: 10.1097/01.ASN.0000141055.57643.E0. PubMed PMID: 15466257.
- 517 3. Ma M, Tian X, Igarashi P, Pazour GJ, Somlo S. Loss of cilia suppresses cyst growth in  
518 genetic models of autosomal dominant polycystic kidney disease. Nat Genet. 2013;45(9):1004-  
519 12. Epub 2013/07/31. doi: 10.1038/ng.2715. PubMed PMID: 23892607; PubMed Central  
520 PMCID: PMC3758452.
- 521 4. Ma M, Gallagher AR, Somlo S. Ciliary Mechanisms of Cyst Formation in Polycystic Kidney  
522 Disease. Cold Spring Harb Perspect Biol. 2017;9(11). Epub 2017/03/23. doi:  
523 10.1101/cshperspect.a028209. PubMed PMID: 28320755; PubMed Central PMCID:  
524 PMC5666631.
- 525 5. Yamaguchi T, Hempson SJ, Reif GA, Hedge AM, Wallace DP. Calcium restores a normal  
526 proliferation phenotype in human polycystic kidney disease epithelial cells. J Am Soc Nephrol.  
527 2006;17(1):178-87. Epub 2005/12/02. doi: 10.1681/ASN.2005060645. PubMed PMID:  
528 16319189.
- 529 6. Yamaguchi T, Wallace DP, Magenheimer BS, Hempson SJ, Grantham JJ, Calvet JP.  
530 Calcium restriction allows cAMP activation of the B-Raf/ERK pathway, switching cells to a  
531 cAMP-dependent growth-stimulated phenotype. J Biol Chem. 2004;279(39):40419-30. Epub  
532 2004/07/21. doi: 10.1074/jbc.M405079200. PubMed PMID: 15263001.

- 533 7. Calvet JP. The Role of Calcium and Cyclic AMP in PKD. In: Li X, editor. Polycystic Kidney  
534 Disease. Brisbane (AU)2015.
- 535 8. Belibi FA, Reif G, Wallace DP, Yamaguchi T, Olsen L, Li H, et al. Cyclic AMP promotes  
536 growth and secretion in human polycystic kidney epithelial cells. *Kidney Int.* 2004;66(3):964-73.  
537 Epub 2004/08/26. doi: 10.1111/j.1523-1755.2004.00843.x. PubMed PMID: 15327388.
- 538 9. Torres VE, Higashihara E, Devuyst O, Chapman AB, Gansevoort RT, Grantham JJ, et al.  
539 Effect of Tolvaptan in Autosomal Dominant Polycystic Kidney Disease by CKD Stage: Results  
540 from the TEMPO 3:4 Trial. *Clin J Am Soc Nephrol.* 2016;11(5):803-11. Epub 2016/02/26. doi:  
541 10.2215/CJN.06300615. PubMed PMID: 26912543; PubMed Central PMCID: PMCPMC4858477.
- 542 10. Torres VE, Chapman AB, Devuyst O, Gansevoort RT, Perrone RD, Koch G, et al. Tolvaptan  
543 in Later-Stage Autosomal Dominant Polycystic Kidney Disease. *N Engl J Med.*  
544 2017;377(20):1930-42. Epub 2017/11/07. doi: 10.1056/NEJMoa1710030. PubMed PMID:  
545 29105594.
- 546 11. Chebib FT, Perrone RD, Chapman AB, Dahl NK, Harris PC, Mrug M, et al. A Practical  
547 Guide for Treatment of Rapidly Progressive ADPKD with Tolvaptan. *J Am Soc Nephrol.*  
548 2018;29(10):2458-70. Epub 2018/09/20. doi: 10.1681/ASN.2018060590. PubMed PMID:  
549 30228150; PubMed Central PMCID: PMCPMC6171265.
- 550 12. Arnould T, Kim E, Tsiokas L, Jochimsen F, Gruning W, Chang JD, et al. The polycystic  
551 kidney disease 1 gene product mediates protein kinase C alpha-dependent and c-Jun N-terminal  
552 kinase-dependent activation of the transcription factor AP-1. *J Biol Chem.* 1998;273(11):6013-8.  
553 Epub 1998/04/16. PubMed PMID: 9497315.
- 554 13. Parnell SC, Magenheimer BS, Maser RL, Zien CA, Frischauf AM, Calvet JP. Polycystin-1  
555 activation of c-Jun N-terminal kinase and AP-1 is mediated by heterotrimeric G proteins. *J Biol*  
556 *Chem.* 2002;277(22):19566-72. Epub 2002/03/26. doi: 10.1074/jbc.M201875200. PubMed  
557 PMID: 11912216.
- 558 14. Arnould T, Sellin L, Benzing T, Tsiokas L, Cohen HT, Kim E, et al. Cellular activation  
559 triggered by the autosomal dominant polycystic kidney disease gene product PKD2. *Mol Cell*  
560 *Biol.* 1999;19(5):3423-34. Epub 1999/04/17. PubMed PMID: 10207066; PubMed Central PMCID:  
561 PMCPMC84135.
- 562 15. Yu W, Kong T, Beaudry S, Tran M, Negoro H, Yanamadala V, et al. Polycystin-1 protein  
563 level determines activity of the Galpha12/JNK apoptosis pathway. *J Biol Chem.*  
564 2010;285(14):10243-51. Epub 2010/01/29. doi: 10.1074/jbc.M109.070821. PubMed PMID:  
565 20106977; PubMed Central PMCID: PMCPMC2856229.
- 566 16. Le NH, van der Wal A, van der Bent P, Lantinga-van Leeuwen IS, Breuning MH, van Dam  
567 H, et al. Increased activity of activator protein-1 transcription factor components ATF2, c-Jun,  
568 and c-Fos in human and mouse autosomal dominant polycystic kidney disease. *J Am Soc*  
569 *Nephrol.* 2005;16(9):2724-31. Epub 2005/07/29. doi: 10.1681/ASN.2004110913. PubMed  
570 PMID: 16049073.
- 571 17. Nishio S, Hatano M, Nagata M, Horie S, Koike T, Tokuhisa T, et al. Pkd1 regulates  
572 immortalized proliferation of renal tubular epithelial cells through p53 induction and JNK  
573 activation. *J Clin Invest.* 2005;115(4):910-8. Epub 2005/03/12. doi: 10.1172/JCI22850. PubMed  
574 PMID: 15761494; PubMed Central PMCID: PMCPMC1059447.
- 575 18. Davis RJ. Signal transduction by the JNK group of MAP kinases. *Cell.* 2000;103(2):239-52.  
576 Epub 2000/11/01. doi: 10.1016/s0092-8674(00)00116-1. PubMed PMID: 11057897.



- 577 19. Smeal T, Binetruy B, Mercola DA, Birrer M, Karin M. Oncogenic and transcriptional  
578 cooperation with Ha-Ras requires phosphorylation of c-Jun on serines 63 and 73. *Nature*.  
579 1991;354(6353):494-6. Epub 1991/12/12. doi: 10.1038/354494a0. PubMed PMID: 1749429.
- 580 20. Parrot C, Kurbegovic A, Yao G, Couillard M, Cote O, Trudel M. c-Myc is a regulator of the  
581 PKD1 gene and PC1-induced pathogenesis. *Hum Mol Genet*. 2019;28(5):751-63. Epub  
582 2018/11/06. doi: 10.1093/hmg/ddy379. PubMed PMID: 30388220; PubMed Central PMCID:  
583 PMC6381314.
- 584 21. Lee EJ, Seo E, Kim JW, Nam SA, Lee JY, Jun J, et al. TAZ/Wnt-beta-catenin/c-MYC axis  
585 regulates cystogenesis in polycystic kidney disease. *Proc Natl Acad Sci U S A*.  
586 2020;117(46):29001-12. Epub 2020/10/31. doi: 10.1073/pnas.2009334117. PubMed PMID:  
587 33122431.
- 588 22. De Borst MH, Prakash J, Melenhorst WB, van den Heuvel MC, Kok RJ, Navis G, et al.  
589 Glomerular and tubular induction of the transcription factor c-Jun in human renal disease. *J*  
590 *Pathol*. 2007;213(2):219-28. Epub 2007/09/25. doi: 10.1002/path.2228. PubMed PMID:  
591 17891746.
- 592 23. Grynberg K, Ozols E, Mulley WR, Davis RJ, Flavell RA, Nikolic-Paterson DJ, et al. JNK1  
593 signaling in the proximal tubule causes cell death and acute renal failure in rat and mouse  
594 models of renal ischaemia/reperfusion injury. *Am J Pathol*. 2021. Epub 2021/02/20. doi:  
595 10.1016/j.ajpath.2021.02.004. PubMed PMID: 33607044.
- 596 24. Kanellis J, Ma FY, Kandane-Rathnayake R, Dowling JP, Polkinghorne KR, Bennett BL, et al.  
597 JNK signalling in human and experimental renal ischaemia/reperfusion injury. *Nephrol Dial*  
598 *Transplant*. 2010;25(9):2898-908. Epub 2010/04/07. doi: 10.1093/ndt/gfq147. PubMed PMID:  
599 20368303.
- 600 25. Ma FY, Flanc RS, Tesch GH, Bennett BL, Friedman GC, Nikolic-Paterson DJ. Blockade of  
601 the c-Jun amino terminal kinase prevents crescent formation and halts established anti-GBM  
602 glomerulonephritis in the rat. *Lab Invest*. 2009;89(4):470-84. Epub 2009/02/04. doi:  
603 10.1038/labinvest.2009.2. PubMed PMID: 19188913.
- 604 26. Ma FY, Flanc RS, Tesch GH, Han Y, Atkins RC, Bennett BL, et al. A pathogenic role for c-  
605 Jun amino-terminal kinase signaling in renal fibrosis and tubular cell apoptosis. *J Am Soc*  
606 *Nephrol*. 2007;18(2):472-84. Epub 2007/01/05. doi: 10.1681/ASN.2006060604. PubMed PMID:  
607 17202416.
- 608 27. de Borst MH, Prakash J, Sandovici M, Klok PA, Hamming I, Kok RJ, et al. c-Jun NH2-  
609 terminal kinase is crucially involved in renal tubulo-interstitial inflammation. *J Pharmacol Exp*  
610 *Ther*. 2009;331(3):896-905. Epub 2009/09/01. doi: 10.1124/jpet.109.154179. PubMed PMID:  
611 19717791.
- 612 28. Happe H, Leonhard WN, van der Wal A, van de Water B, Lantinga-van Leeuwen IS,  
613 Breuning MH, et al. Toxic tubular injury in kidneys from Pkd1-deletion mice accelerates  
614 cystogenesis accompanied by dysregulated planar cell polarity and canonical Wnt signaling  
615 pathways. *Hum Mol Genet*. 2009;18(14):2532-42. Epub 2009/04/30. doi: 10.1093/hmg/ddp190.  
616 PubMed PMID: 19401297.
- 617 29. Prasad S, McDaid JP, Tam FW, Haylor JL, Ong AC. Pkd2 dosage influences cellular repair  
618 responses following ischemia-reperfusion injury. *Am J Pathol*. 2009;175(4):1493-503. Epub  
619 2009/09/05. doi: 10.2353/ajpath.2009.090227. PubMed PMID: 19729489; PubMed Central  
620 PMCID: PMC6381314.

- 621 30. Kurbegovic A, Trudel M. Acute kidney injury induces hallmarks of polycystic kidney  
622 disease. *Am J Physiol Renal Physiol*. 2016;311(4):F740-F51. Epub 2016/08/05. doi:  
623 10.1152/ajprenal.00167.2016. PubMed PMID: 27488998.
- 624 31. Wernig G, Chen SY, Cui L, Van Neste C, Tsai JM, Kambham N, et al. Unifying mechanism  
625 for different fibrotic diseases. *Proc Natl Acad Sci U S A*. 2017;114(18):4757-62. Epub  
626 2017/04/21. doi: 10.1073/pnas.1621375114. PubMed PMID: 28424250; PubMed Central  
627 PMCID: PMC5422830.
- 628 32. Garcia-Gonzalez MA, Outeda P, Zhou Q, Zhou F, Menezes LF, Qian F, et al. Pkd1 and  
629 Pkd2 are required for normal placental development. *PLoS One*. 2010;5(9). Epub 2010/09/24.  
630 doi: 10.1371/journal.pone.0012821. PubMed PMID: 20862291; PubMed Central PMCID:  
631 PMC2940908.
- 632 33. Das M, Jiang F, Sluss HK, Zhang C, Shokat KM, Flavell RA, et al. Suppression of p53-  
633 dependent senescence by the JNK signal transduction pathway. *Proc Natl Acad Sci U S A*.  
634 2007;104(40):15759-64. Epub 2007/09/26. doi: 10.1073/pnas.0707782104. PubMed PMID:  
635 17893331; PubMed Central PMCID: PMC2000443.
- 636 34. Yang DD, Conze D, Whitmarsh AJ, Barrett T, Davis RJ, Rincon M, et al. Differentiation of  
637 CD4+ T cells to Th1 cells requires MAP kinase JNK2. *Immunity*. 1998;9(4):575-85. Epub  
638 1998/11/07. doi: 10.1016/s1074-7613(00)80640-8. PubMed PMID: 9806643.
- 639 35. Badea TC, Wang Y, Nathans J. A noninvasive genetic/pharmacologic strategy for  
640 visualizing cell morphology and clonal relationships in the mouse. *J Neurosci*. 2003;23(6):2314-  
641 22. Epub 2003/03/27. PubMed PMID: 12657690; PubMed Central PMCID: PMC6742025.
- 642 36. Tobiume K, Matsuzawa A, Takahashi T, Nishitoh H, Morita K, Takeda K, et al. ASK1 is  
643 required for sustained activations of JNK/p38 MAP kinases and apoptosis. *EMBO Rep*.  
644 2001;2(3):222-8. Epub 2001/03/27. doi: 10.1093/embo-reports/kve046. PubMed PMID:  
645 11266364; PubMed Central PMCID: PMC1083842.
- 646 37. Kant S, Swat W, Zhang S, Zhang ZY, Neel BG, Flavell RA, et al. TNF-stimulated MAP kinase  
647 activation mediated by a Rho family GTPase signaling pathway. *Genes Dev*. 2011;25(19):2069-  
648 78. Epub 2011/10/08. doi: 10.1101/gad.17224711. PubMed PMID: 21979919; PubMed Central  
649 PMCID: PMC3197205.
- 650 38. Brancho D, Ventura JJ, Jaeschke A, Doran B, Flavell RA, Davis RJ. Role of MLK3 in the  
651 regulation of mitogen-activated protein kinase signaling cascades. *Mol Cell Biol*.  
652 2005;25(9):3670-81. Epub 2005/04/16. doi: 10.1128/MCB.25.9.3670-3681.2005. PubMed  
653 PMID: 15831472; PubMed Central PMCID: PMC1084312.
- 654 39. Sadate-Ngatchou PI, Payne CJ, Dearth AT, Braun RE. Cre recombinase activity specific to  
655 postnatal, premeiotic male germ cells in transgenic mice. *Genesis*. 2008;46(12):738-42. Epub  
656 2008/10/14. doi: 10.1002/dvg.20437. PubMed PMID: 18850594; PubMed Central PMCID:  
657 PMC2837914.
- 658 40. Ventura A, Kirsch DG, McLaughlin ME, Tuveson DA, Grimm J, Lintault L, et al. Restoration  
659 of p53 function leads to tumour regression in vivo. *Nature*. 2007;445(7128):661-5. Epub  
660 2007/01/26. doi: 10.1038/nature05541. PubMed PMID: 17251932.
- 661 41. Chang-Panesso M, Kadyrov FF, Machado FG, Kumar A, Humphreys BD. Meis1 is  
662 specifically upregulated in kidney myofibroblasts during aging and injury but is not required for  
663 kidney homeostasis or fibrotic response. *Am J Physiol Renal Physiol*. 2018;315(2):F275-F90.

- 664 Epub 2018/03/30. doi: 10.1152/ajprenal.00030.2018. PubMed PMID: 29592525; PubMed  
665 Central PMCID: PMC6139520.
- 666 42. Tesch GH, Ma FY, Nikolic-Paterson DJ. Targeting apoptosis signal-regulating kinase 1 in  
667 acute and chronic kidney disease. *Anat Rec (Hoboken)*. 2020. Epub 2020/01/24. doi:  
668 10.1002/ar.24373. PubMed PMID: 31971352.
- 669 43. Teramoto H, Coso OA, Miyata H, Igishi T, Miki T, Gutkind JS. Signaling from the small  
670 GTP-binding proteins Rac1 and Cdc42 to the c-Jun N-terminal kinase/stress-activated protein  
671 kinase pathway. A role for mixed lineage kinase 3/protein-tyrosine kinase 1, a novel member of  
672 the mixed lineage kinase family. *J Biol Chem*. 1996;271(44):27225-8. Epub 1996/11/01. doi:  
673 10.1074/jbc.271.44.27225. PubMed PMID: 8910292.
- 674 44. Du Y, Bock BC, Schachter KA, Chao M, Gallo KA. Cdc42 induces activation loop  
675 phosphorylation and membrane targeting of mixed lineage kinase 3. *J Biol Chem*.  
676 2005;280(52):42984-93. Epub 2005/10/29. doi: 10.1074/jbc.M502671200. PubMed PMID:  
677 16253996.
- 678 45. Pulverer BJ, Kyriakis JM, Avruch J, Nikolakaki E, Woodgett JR. Phosphorylation of c-jun  
679 mediated by MAP kinases. *Nature*. 1991;353(6345):670-4. Epub 1991/10/17. doi:  
680 10.1038/353670a0. PubMed PMID: 1922387.
- 681 46. Zhang C, Balbo B, Ma M, Zhao J, Tian X, Kluger Y, et al. Cyclin-Dependent Kinase 1  
682 Activity Is a Driver of Cyst Growth in Polycystic Kidney Disease. *J Am Soc Nephrol*. 2020. Epub  
683 2020/10/14. doi: 10.1681/ASN.2020040511. PubMed PMID: 33046531.
- 684 47. Zhang Y, Dai Y, Raman A, Daniel E, Metcalf J, Reif G, et al. Overexpression of TGF-beta1  
685 induces renal fibrosis and accelerates the decline in kidney function in polycystic kidney  
686 disease. *Am J Physiol Renal Physiol*. 2020;319(6):F1135-F48. Epub 2020/11/10. doi:  
687 10.1152/ajprenal.00366.2020. PubMed PMID: 33166182.
- 688 48. Wu Q, Wu W, Jacevic V, Franca TCC, Wang X, Kuca K. Selective inhibitors for JNK  
689 signalling: a potential targeted therapy in cancer. *J Enzyme Inhib Med Chem*. 2020;35(1):574-  
690 83. Epub 2020/01/30. doi: 10.1080/14756366.2020.1720013. PubMed PMID: 31994958;  
691 PubMed Central PMCID: PMC67034130.
- 692 49. Manning AM, Davis RJ. Targeting JNK for therapeutic benefit: from junk to gold? *Nat Rev*  
693 *Drug Discov*. 2003;2(7):554-65. Epub 2003/06/20. doi: 10.1038/nrd1132. PubMed PMID:  
694 12815381.
- 695 50. Gupta S, Barrett T, Whitmarsh AJ, Cavanagh J, Sluss HK, Derijard B, et al. Selective  
696 interaction of JNK protein kinase isoforms with transcription factors. *EMBO J*.  
697 1996;15(11):2760-70. Epub 1996/06/03. PubMed PMID: 8654373; PubMed Central PMCID:  
698 PMC450211.
- 699 51. Derijard B, Hibi M, Wu IH, Barrett T, Su B, Deng T, et al. JNK1: a protein kinase  
700 stimulated by UV light and Ha-Ras that binds and phosphorylates the c-Jun activation domain.  
701 *Cell*. 1994;76(6):1025-37. Epub 1994/03/25. doi: 10.1016/0092-8674(94)90380-8. PubMed  
702 PMID: 8137421.
- 703 52. Piontek K, Menezes LF, Garcia-Gonzalez MA, Huso DL, Germino GG. A critical  
704 developmental switch defines the kinetics of kidney cyst formation after loss of Pkd1. *Nat Med*.  
705 2007;13(12):1490-5. Epub 2007/10/30. doi: 10.1038/nm1675. PubMed PMID: 17965720;  
706 PubMed Central PMCID: PMC2302790.

- 707 53. Lantinga-van Leeuwen IS, Leonhard WN, van der Wal A, Breuning MH, de Heer E, Peters  
708 DJ. Kidney-specific inactivation of the Pkd1 gene induces rapid cyst formation in developing  
709 kidneys and a slow onset of disease in adult mice. *Hum Mol Genet.* 2007;16(24):3188-96. Epub  
710 2007/10/13. doi: 10.1093/hmg/ddm299. PubMed PMID: 17932118.
- 711 54. Everson GT. Hepatic cysts in autosomal dominant polycystic kidney disease. *Am J Kidney*  
712 *Dis.* 1993;22(4):520-5. Epub 1993/10/01. doi: 10.1016/s0272-6386(12)80923-1. PubMed PMID:  
713 8213790.
- 714 55. Chauveau D, Fakhouri F, Grunfeld JP. Liver involvement in autosomal-dominant  
715 polycystic kidney disease: therapeutic dilemma. *J Am Soc Nephrol.* 2000;11(9):1767-75. Epub  
716 2000/08/31. PubMed PMID: 10966503.
- 717 56. Lim AK, Ma FY, Nikolic-Paterson DJ, Ozols E, Young MJ, Bennett BL, et al. Evaluation of  
718 JNK blockade as an early intervention treatment for type 1 diabetic nephropathy in  
719 hypertensive rats. *Am J Nephrol.* 2011;34(4):337-46. Epub 2011/08/31. doi:  
720 10.1159/000331058. PubMed PMID: 21876346.
- 721 57. Uehara T, Bennett B, Sakata ST, Satoh Y, Bilter GK, Westwick JK, et al. JNK mediates  
722 hepatic ischemia reperfusion injury. *J Hepatol.* 2005;42(6):850-9. Epub 2005/05/12. doi:  
723 10.1016/j.jhep.2005.01.030. PubMed PMID: 15885356.
- 724 58. Uehara T, Xi Peng X, Bennett B, Satoh Y, Friedman G, Currin R, et al. c-Jun N-terminal  
725 kinase mediates hepatic injury after rat liver transplantation. *Transplantation.* 2004;78(3):324-  
726 32. Epub 2004/08/19. doi: 10.1097/01.tp.0000128859.42696.28. PubMed PMID: 15316358.
- 727 59. Bubici C, Papa S. JNK signalling in cancer: in need of new, smarter therapeutic targets. *Br*  
728 *J Pharmacol.* 2014;171(1):24-37. Epub 2013/10/15. doi: 10.1111/bph.12432. PubMed PMID:  
729 24117156; PubMed Central PMCID: PMC3874694.
- 730 60. Tomita K, Kohli R, MacLaurin BL, Hirsova P, Guo Q, Sanchez LHG, et al. Mixed-lineage  
731 kinase 3 pharmacological inhibition attenuates murine nonalcoholic steatohepatitis. *JCI Insight.*  
732 2017;2(15). Epub 2017/08/05. doi: 10.1172/jci.insight.94488. PubMed PMID: 28768902;  
733 PubMed Central PMCID: PMC5543922.
- 734 61. Dong W, Embury CM, Lu Y, Whitmire SM, Dyavarshetty B, Gelbard HA, et al. The mixed-  
735 lineage kinase 3 inhibitor URM-099 facilitates microglial amyloid-beta degradation. *J*  
736 *Neuroinflammation.* 2016;13(1):184. Epub 2016/07/13. doi: 10.1186/s12974-016-0646-z.  
737 PubMed PMID: 27401058; PubMed Central PMCID: PMC4940949.
- 738 62. Kiyota T, Machhi J, Lu Y, Dyavarshetty B, Nemati M, Zhang G, et al. URM-099 facilitates  
739 amyloid-beta clearance in a murine model of Alzheimer's disease. *J Neuroinflammation.*  
740 2018;15(1):137. Epub 2018/05/08. doi: 10.1186/s12974-018-1172-y. PubMed PMID: 29729668;  
741 PubMed Central PMCID: PMC5935963.
- 742 63. Younossi ZM, Stepanova M, Lawitz E, Charlton M, Loomba R, Myers RP, et al.  
743 Improvement of hepatic fibrosis and patient-reported outcomes in non-alcoholic  
744 steatohepatitis treated with selonsertib. *Liver Int.* 2018;38(10):1849-59. Epub 2018/01/30. doi:  
745 10.1111/liv.13706. PubMed PMID: 29377462.
- 746 64. Loomba R, Lawitz E, Mantry PS, Jayakumar S, Caldwell SH, Arnold H, et al. The ASK1  
747 inhibitor selonsertib in patients with nonalcoholic steatohepatitis: A randomized, phase 2 trial.  
748 *Hepatology.* 2018;67(2):549-59. Epub 2017/09/12. doi: 10.1002/hep.29514. PubMed PMID:  
749 28892558; PubMed Central PMCID: PMC5814892.

- 750 65. Weston CR, Davis RJ. The JNK signal transduction pathway. *Curr Opin Cell Biol.*  
751 2007;19(2):142-9. Epub 2007/02/17. doi: 10.1016/j.ceb.2007.02.001. PubMed PMID: 17303404.
- 752 66. Parnell SC, Magenheimer BS, Maser RL, Pavlov TS, Havens MA, Hastings ML, et al. A  
753 mutation affecting polycystin-1 mediated heterotrimeric G-protein signaling causes PKD. *Hum*  
754 *Mol Genet.* 2018;27(19):3313-24. Epub 2018/06/23. doi: 10.1093/hmg/ddy223. PubMed PMID:  
755 29931260; PubMed Central PMCID: PMC6140781.
- 756 67. Zhao HF, Wang J, Tony To SS. The phosphatidylinositol 3-kinase/Akt and c-Jun N-  
757 terminal kinase signaling in cancer: Alliance or contradiction? (Review). *Int J Oncol.*  
758 2015;47(2):429-36. Epub 2015/06/18. doi: 10.3892/ijo.2015.3052. PubMed PMID: 26082006.
- 759 68. Wu Q, Wu W, Fu B, Shi L, Wang X, Kuca K. JNK signaling in cancer cell survival. *Med Res*  
760 *Rev.* 2019;39(6):2082-104. Epub 2019/03/27. doi: 10.1002/med.21574. PubMed PMID:  
761 30912203.
- 762 69. Abdelrahman KS, Hassan HA, Abdel-Aziz SA, Marzouk AA, Narumi A, Konno H, et al. JNK  
763 signaling as a target for anticancer therapy. *Pharmacol Rep.* 2021;73(2):405-34. Epub  
764 2021/03/13. doi: 10.1007/s43440-021-00238-y. PubMed PMID: 33710509.
- 765 70. Vernia S, Edwards YJ, Han MS, Cavanagh-Kyros J, Barrett T, Kim JK, et al. An alternative  
766 splicing program promotes adipose tissue thermogenesis. *Elife.* 2016;5. Epub 2016/09/17. doi:  
767 10.7554/eLife.17672. PubMed PMID: 27635635; PubMed Central PMCID: PMC5026472.
- 768 71. Bae KT, Zhu F, Chapman AB, Torres VE, Grantham JJ, Guay-Woodford LM, et al.  
769 Magnetic resonance imaging evaluation of hepatic cysts in early autosomal-dominant polycystic  
770 kidney disease: the Consortium for Radiologic Imaging Studies of Polycystic Kidney Disease  
771 cohort. *Clin J Am Soc Nephrol.* 2006;1(1):64-9. Epub 2007/08/21. doi: 10.2215/CJN.00080605.  
772 PubMed PMID: 17699192.
- 773 72. Gevers TJ, Chrispijn M, Wetzels JF, Drenth JP. Rationale and design of the RESOLVE trial:  
774 lanreotide as a volume reducing treatment for polycystic livers in patients with autosomal  
775 dominant polycystic kidney disease. *BMC Nephrol.* 2012;13:17. Epub 2012/04/06. doi:  
776 10.1186/1471-2369-13-17. PubMed PMID: 22475206; PubMed Central PMCID:  
777 PMC3368739.
- 778 73. Yuan D, Huang S, Berger E, Liu L, Gross N, Heinzmann F, et al. Kupffer Cell-Derived Tnf  
779 Triggers Cholangiocellular Tumorigenesis through JNK due to Chronic Mitochondrial  
780 Dysfunction and ROS. *Cancer Cell.* 2017;31(6):771-89 e6. Epub 2017/06/14. doi:  
781 10.1016/j.ccell.2017.05.006. PubMed PMID: 28609656; PubMed Central PMCID:  
782 PMC37909318.
- 783 74. Cubero FJ, Mohamed MR, Woitok MM, Zhao G, Hatting M, Nevzorova YA, et al. Loss of  
784 c-Jun N-terminal Kinase 1 and 2 Function in Liver Epithelial Cells Triggers Biliary  
785 Hyperproliferation Resembling Cholangiocarcinoma. *Hepatol Commun.* 2020;4(6):834-51. Epub  
786 2020/06/04. doi: 10.1002/hep4.1495. PubMed PMID: 32490320; PubMed Central PMCID:  
787 PMC7262317.
- 788 75. Muller K, Honcharova-Biletska H, Koppe C, Egger M, Chan LK, Schneider AT, et al. JNK  
789 signaling prevents biliary cyst formation through a CASPASE-8-dependent function of RIPK1  
790 during aging. *Proc Natl Acad Sci U S A.* 2021;118(12). Epub 2021/04/03. doi:  
791 10.1073/pnas.2007194118. PubMed PMID: 33798093; PubMed Central PMCID:  
792 PMC8000530.



793 76. Manieri E, Folgueira C, Rodriguez ME, Leiva-Vega L, Esteban-Lafuente L, Chen C, et al.  
794 JNK-mediated disruption of bile acid homeostasis promotes intrahepatic cholangiocarcinoma.  
795 Proc Natl Acad Sci U S A. 2020;117(28):16492-9. Epub 2020/07/01. doi:  
796 10.1073/pnas.2002672117. PubMed PMID: 32601222; PubMed Central PMCID:  
797 PMCPMC7368313.  
798

## Supplemental Material Table of Contents

Supplemental Figure 1. Variation in *Pkd2* mRNA levels is similar in *Pkd2* mutants with or without *Jnk*.

Supplemental Figure 2. Deletion of MAP3 Kinases *Ask1*, *Mlk2* and *Mlk3* is not sufficient to reduce kidney cysts in juvenile *Pkd2* mutant mice.

Supplemental Figure 3. *Pkd2* loss induces phosphorylation of long and short isoforms of *Jnk1* and *Jnk2*.

Supplemental Figure 4. Adult mice do not develop kidney cysts within 6 months of *Pkd2* deletion.

Supplemental Figure 5. Sex does not influence severity of cystic phenotype in adult *Pkd2* mutant mice.



### Supplemental Figure 1. Variation in Pkd2 mRNA levels is similar in Pkd2 mutant kidneys with or without Jnk.

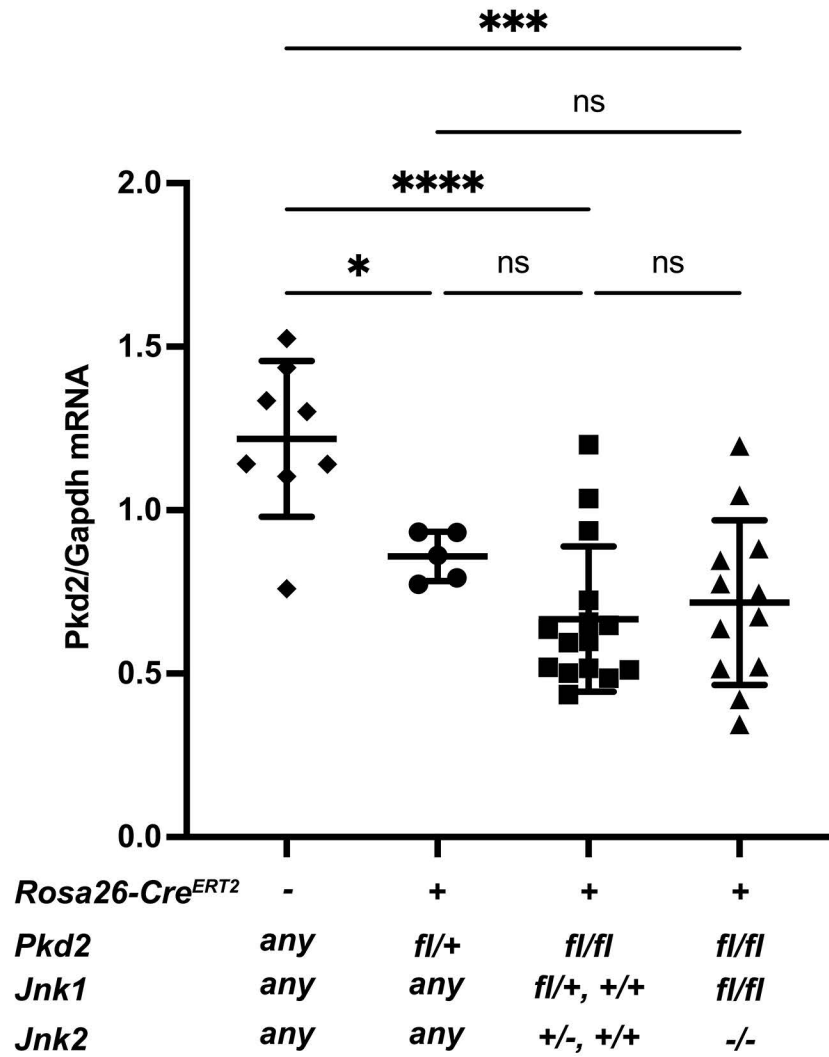

**Supplemental Figure 1. Variation in *Pkd2* mRNA levels is similar in *Pkd2* mutants with or without *Jnk*.**

(A) Total RNA was extracted from P21 kidneys. *Pkd2* mRNA levels were determined by RT-qPCR and normalized to *Gapdh*. All animals were treated with tamoxifen by maternal oral gavage on P2-4. The groups consist of Cre-negative animals (N = 8), *Pkd2* heterozygotes with any number of *Jnk* alleles (*Rosa26-Cre<sup>ERT2</sup>; Pkd2<sup>fl/+</sup>*) (N = 5), *Pkd2* mutants with at least one wild type allele of *Jnk1* and *Jnk2* (*Rosa26-Cre<sup>ERT2</sup>; Pkd2<sup>fl/fl</sup>*) (N = 12), and *Pkd2* mutants with no functional *Jnk* alleles (*Rosa26-Cre<sup>ERT2</sup>; Pkd2<sup>fl/fl</sup>; Jnk1<sup>fl/fl</sup>; Jnk2<sup>null/null</sup>*) (N = 15). \*\*\*\*, P < 0.0001; \*\*\*, P < 0.001; \*, <0.05; ns, not significant by one-way ANOVA followed by Tukey multiple comparison test with multiplicity-adjusted p-values. Error bars indicate SD.



**Supplemental Figure 2. Deletion of MAP3 Kinases *Ask1*, *Mlk2* and *Mlk3* is not sufficient to reduce kidney cysts in juvenile *Pkd2* mutant mice.**

Mice with the following genotypes were treated with tamoxifen at P2-4 and collected at P21:

Wt (*Rosa26-Cre<sup>ERT2</sup>; Pkd2<sup>fl/+</sup>*), *Pkd2* (*Rosa26-Cre<sup>ERT2</sup>; Pkd2<sup>fl/fl</sup>*), *Pkd2-Ask1* (*Rosa26-Cre<sup>ERT2</sup>; Pkd2<sup>fl/fl</sup>; Ask1<sup>-/-</sup>*) and *Pkd2-Mlk2/3* (*Rosa26-Cre<sup>ERT2</sup>; Pkd2<sup>fl/fl</sup>; Mlk2<sup>-/-</sup>; Mlk3<sup>-/-</sup>*).

(A) Cystic burden was quantified using the ratio of 2-kidney weight / body weight x 100%. N is 17 (Wt), 25 (*Pkd2*), 23 (*Pkd2-Ask1*). \*\*\*\*,  $P < 0.0001$ ; ns, not significant by one-way ANOVA followed by Tukey multiple comparison test with multiplicity-adjusted p-values. Error bars indicate SD.

(B) Cystic burden was quantified using the ratio of 2-kidney weight / bodyweight x 100%. N is 12 (Wt), 23 (*Pkd2*), 11 (*Pkd2-Mlk2/3*). \*\*\*\*,  $P < 0.0001$ ; \*\*\*,  $P < 0.001$ ; ns, not significant by one-way ANOVA followed by Tukey multiple comparison test with multiplicity-adjusted p-values. Error bars indicate SD.

## Supplemental Figure 3. Pkd2 loss induces phosphorylation of long and short Jnk isoforms.

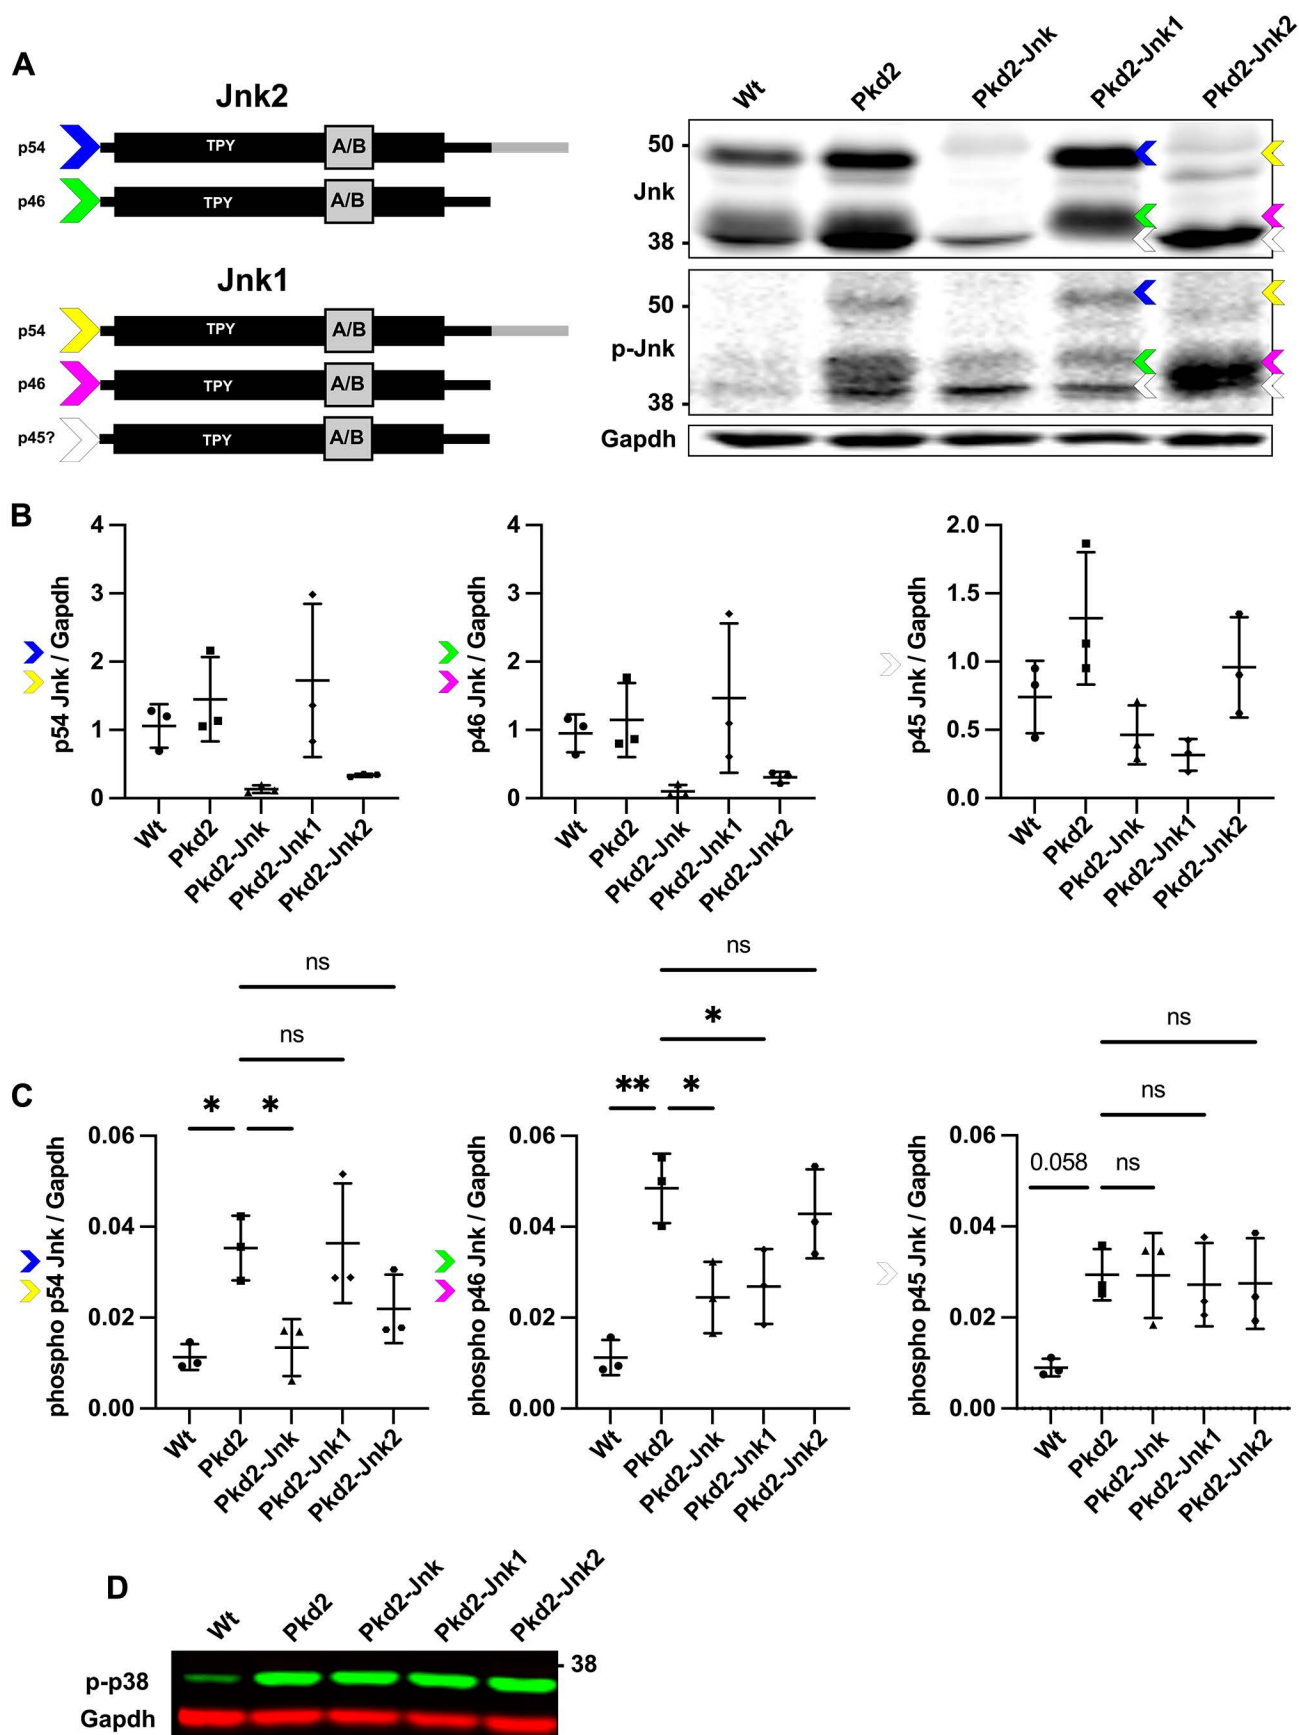

### Supplemental Figure 3. *Pkd2* loss induces phosphorylation of long and short isoforms of *Jnk1* and *Jnk2*.

Mice described in Figure 2: Wt (*Rosa26-Cre<sup>ERT2</sup>; Pkd2<sup>fl/+</sup>*), *Pkd2* (*Rosa26-Cre<sup>ERT2</sup>; Pkd2<sup>fl/fl</sup>; JNK1<sup>+/+</sup>; Jnk2<sup>+/+</sup>*), *Pkd2*-Jnk (*Rosa26-Cre<sup>ERT2</sup>; Pkd2<sup>fl/fl</sup>; Jnk1<sup>fl/fl</sup>; Jnk2<sup>null/null</sup>*)

Mice described in Figure 6: *Pkd2*-Jnk1 (*Rosa26-Cre<sup>ERT2</sup>; Pkd2<sup>fl/fl</sup>; Jnk1<sup>null/null</sup>; Jnk2<sup>+/+</sup>*); *Pkd2*-Jnk2 (*Rosa26-Cre<sup>ERT2</sup>; Pkd2<sup>fl/fl</sup>; JNK1<sup>+/+</sup>; Jnk2<sup>null/null</sup>*).

(A) Whole kidney protein lysates were immunoblotted for total Jnk, phospho T183/Y185 Jnk, and loading control Gapdh. The diagram (left) depicts the primary known isoforms of Jnk1 and Jnk2, as well as a putative isoform of Jnk1. Both Jnk1 and Jnk2 can be alternatively spliced to form four variants. Incorporation of the mutually exclusive exon pair 6a/6b in the kinase domain does not affect size of the protein, but alternative splicing at the C-terminus can produce either long (p54) or short (p46) forms that can be distinguished by immunoblot. Colored arrows indicate corresponding isoforms on the blot. These represent our predictions of which isoforms are present in each band. The white arrows correspond to a band of unknown identity (p45) which we quantified separately.

(B-C) Quantification of immunoblots described in (A). N is 3 animals per group. Due to low sample number, differences in total Jnk isoform levels did not reach statistical significance in most cases and are not displayed. For phosphorylated Jnk isoforms, we indicate the significance of each group compared to *Pkd2* mutants. Phospho-p45 nearly reached significance with  $p = 0.058$ . \*\*,  $P < 0.01$ ; \*,  $P < 0.05$ ; ns, not significant by one-way ANOVA followed by Tukey multiple comparison test with multiplicity-adjusted p-values. Error bars indicate SD.

(D) The kidney lysates described in (A) were immunoblotted for phospho T180/Y182 p38 and loading control Gapdh.



## Supplemental Figure 4. Kidney cysts do not develop within 6 months of adult Pkd2 deletion.

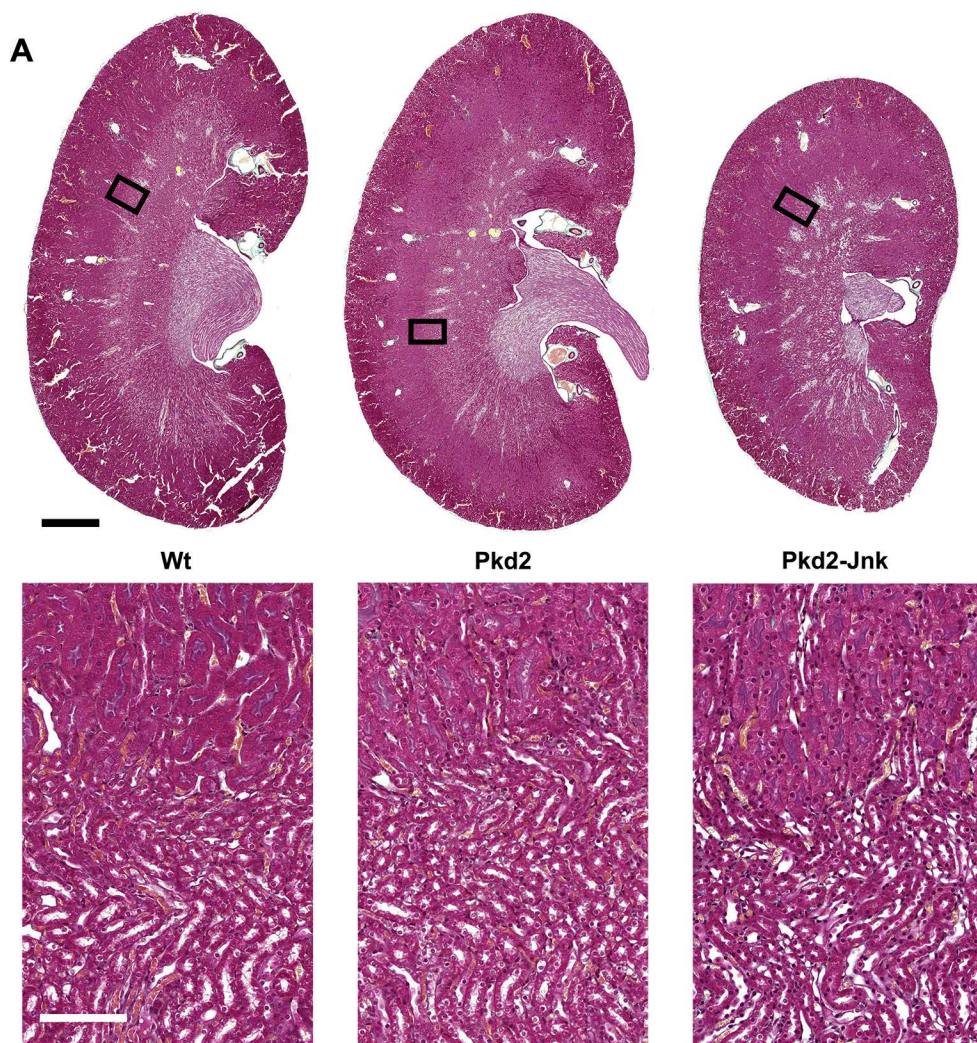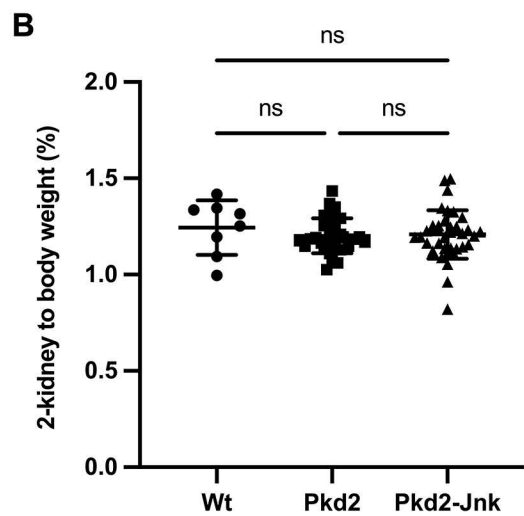

#### **Supplemental Figure 4. Kidney cysts do not develop within 6 months of adult Pkd2 deletion.**

Mice with the following genotypes were treated with tamoxifen at P21-23 and collected 24 weeks later: Wt (*Rosa26-Cre<sup>ERT2</sup>; Pkd2<sup>fl/+</sup>*), Pkd2 (*Rosa26-Cre<sup>ERT2</sup>; Pkd2<sup>fl/fl</sup>; Jnk1<sup>+/+, fl/+</sup>; Jnk2<sup>+/+, +/-</sup>*), Pkd2-Jnk (*Rosa26-Cre<sup>ERT2</sup>; Pkd2<sup>fl/fl</sup>; Jnk1<sup>fl/fl</sup>; Jnk2<sup>null/null</sup>*).

(A) Kidney sections were stained with one-step trichrome to mark collagen fibers pale green, cytoplasm red, and nuclei dark blue. Scale bar is 1000 microns for full size kidney scans, 100 microns for insets.

(B) Cystic burden in the kidney was quantified using the ratio of 2-kidney / body weight x 100%. N is 8 (Wt), 31 (Pkd2), 38 (Pkd2-Jnk). ns, not significant by one-way ANOVA followed by Tukey multiple comparison test with multiplicity-adjusted p-values. Error bars indicate SD.

## Supplemental Figure 5. Sex does not influence severity of cystic phenotype in adult Pkd2 mutant mice.

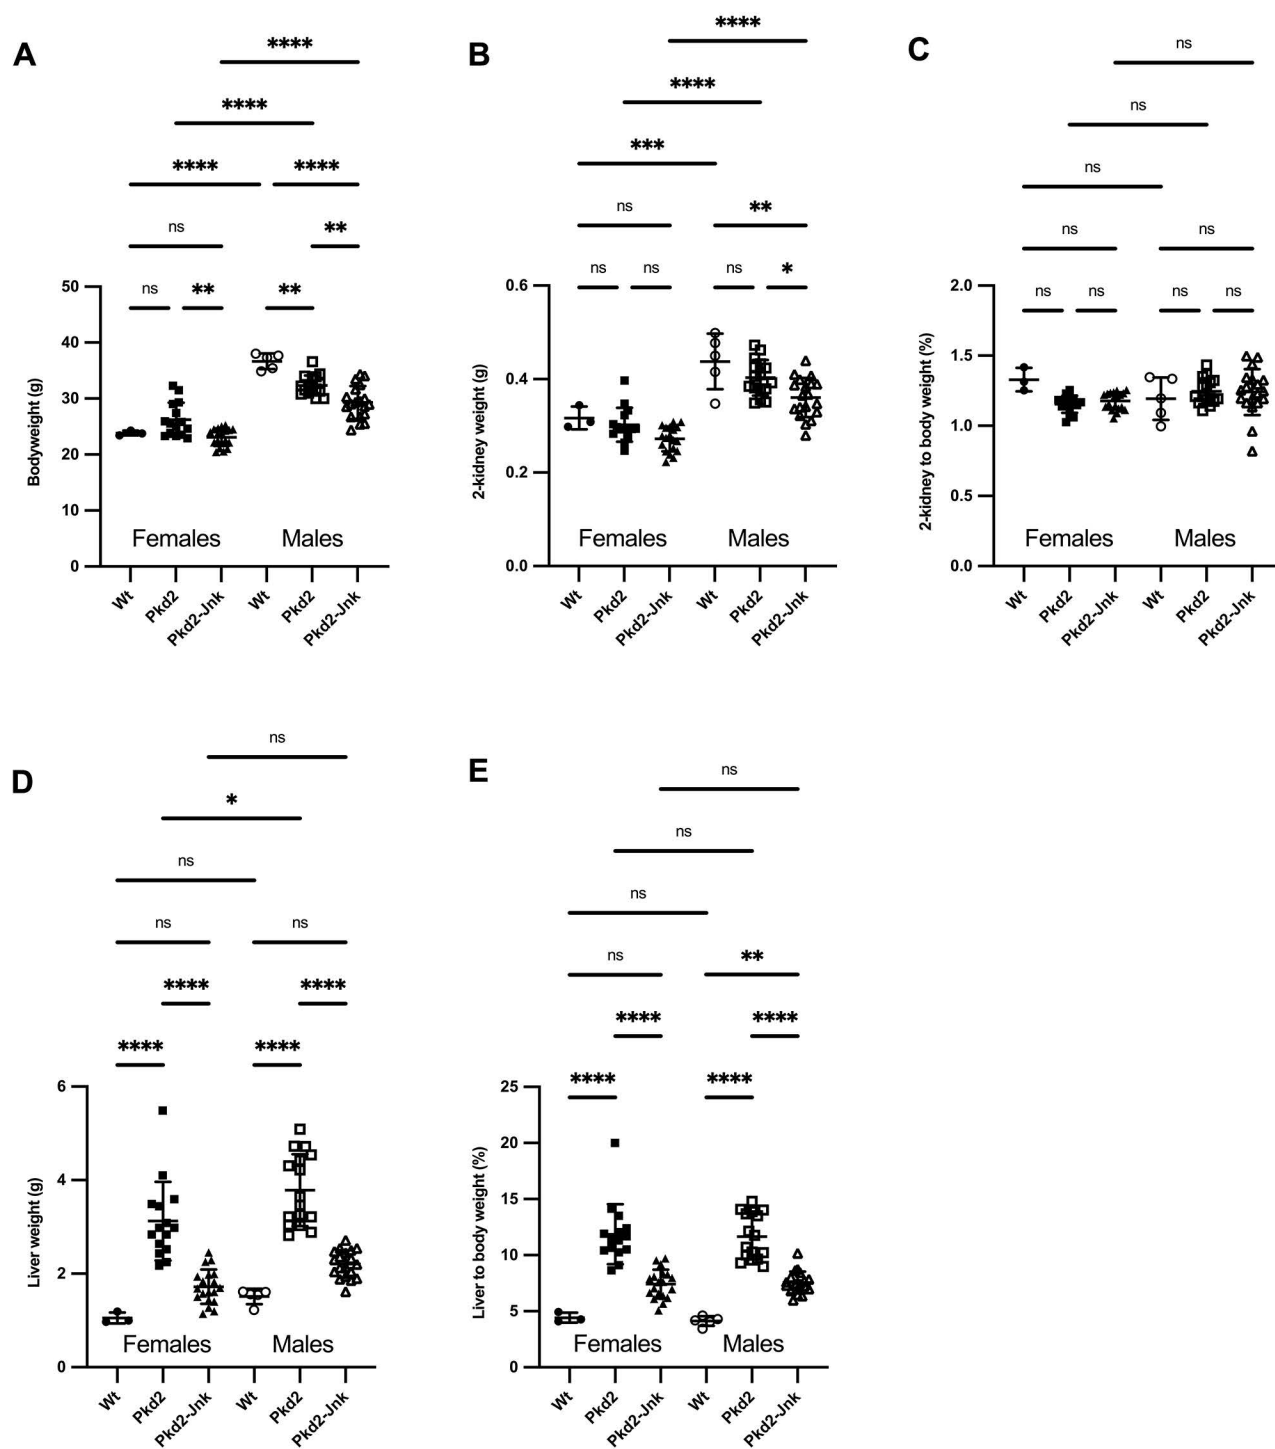

### Supplemental Figure 5. Sex does not influence severity of cystic phenotype in adult *Pkd2* mutant mice.

Mice with the following genotypes were treated with tamoxifen at P21-23 and collected 24 weeks later: Wt (*Rosa26-Cre<sup>ERT2</sup>; Pkd2<sup>fl/+</sup>*), *Pkd2* (*Rosa26-Cre<sup>ERT2</sup>; Pkd2<sup>fl/fl</sup>; Jnk1<sup>+/+, fl/+</sup>; Jnk2<sup>+/+, +/-</sup>*), *Pkd2*-Jnk (*Rosa26-Cre<sup>ERT2</sup>; Pkd2<sup>fl/fl</sup>; Jnk1<sup>fl/fl</sup>; Jnk2<sup>null/null</sup>*).

(A) Body weight of adult *Pkd2* mutant mice, segregated by sex. Females: N is 3 (Wt), 15 (*Pkd2*), 19 (PKD2-JNK). Males: N is 5 (Wt), 16 (*Pkd2*), 19 (*Pkd2*-Jnk). \*\*\*\*,  $P < 0.0001$ ; \*\*,  $P < 0.01$ ; ns, not significant by one-way ANOVA followed by Tukey multiple comparison test with multiplicity-adjusted p-values. Error bars indicate SD.

(B-C) 2-kidney weight and 2-kidney to body weight (%) of adult *Pkd2* mutant mice, segregated by sex. Females: N is 3 (Wt), 15 (*Pkd2*), 19 (PKD2-JNK). Males: N is 5 (Wt), 16 (*Pkd2*), 19 (*Pkd2*-Jnk). \*\*\*\*,  $P < 0.0001$ ; \*\*\*,  $P < 0.001$ ; \*\*,  $P < 0.01$ ; \*,  $P < 0.05$ ; ns, not significant by one-way ANOVA followed by Tukey multiple comparison test with multiplicity-adjusted p-values. Error bars indicate SD.

(D-E) Liver weight and liver to body weight (%) of adult *Pkd2* mutant mice, segregated by sex. Females: Females: N is 3 (Wt), 15 (*Pkd2*), 19 (PKD2-JNK). Males: N is 5 (Wt), 16 (*Pkd2*), 19 (*Pkd2*-Jnk). \*\*\*\*,  $P < 0.0001$ ; \*\*,  $P < 0.01$ ; ns, not significant by one-way ANOVA followed by Tukey multiple comparison test with multiplicity-adjusted p-values. Error bars indicate SD.
